# Supplementary material
Source: PubMed Central journal article supplement (PMC5376764)
Supplement: EMBR-18-569-s001.pdf [file EMBR-18-569-s001.pdf]

## Appendix – Table of Contents

|                                                                                                                                                                                                                          | Page |
|--------------------------------------------------------------------------------------------------------------------------------------------------------------------------------------------------------------------------|------|
| Figure S1. Relative expression and abundances of significantly altered transcripts and metabolites, respectively, in LT2-MYC tumors compared to naïve livers, for the glutathione metabolism pathway.                    | 2    |
| Figure S2. Relative expression and abundances of significantly altered transcripts and metabolites, respectively, in LT2-MYC tumors compared to naïve livers, for the glycine, serine, and threonine metabolism pathway. | 3    |
| Figure S3. Relative expression and abundances of significantly altered transcripts and metabolites, respectively, in LT2-MYC tumors compared to naïve livers, for the aminoacyl-tRNA biosynthesis pathway.               | 4    |
| Figure S4. Relative expression and abundances of significantly altered transcripts and metabolites, respectively, in LT2-MYC tumors compared to naïve livers, for the cysteine and methionine metabolism pathway.        | 5    |
| Figure S5. Relative expression and abundances of significantly altered transcripts and metabolites, respectively, in LT2-MYC tumors compared to naïve livers, for the ABC transporters pathway.                          | 6    |
| Figure S6. Relative expression and abundances of significantly altered transcripts and metabolites, respectively, in LT2-MYC tumors compared to naïve livers, for the mineral absorption pathway.                        | 7    |
| Table S1. Metabolic pathways overrepresented in mRNA and metabolite profiling of LT2-MYC tumors.                                                                                                                         | 8    |
| Table S2. Summary output of TargetScanHuman (v6.2) predictions of GCLC 3' UTR-binding miRNAs.                                                                                                                            | 9    |
| Table S3. Summary of miRNA candidate expression in LT2 MYC tumors versus nontumor control liver.                                                                                                                         | 10   |
| Table S4. Summary of MYC-dependent regulation of glutathione pathway genes.                                                                                                                                              | 11   |

Glutathione metabolism

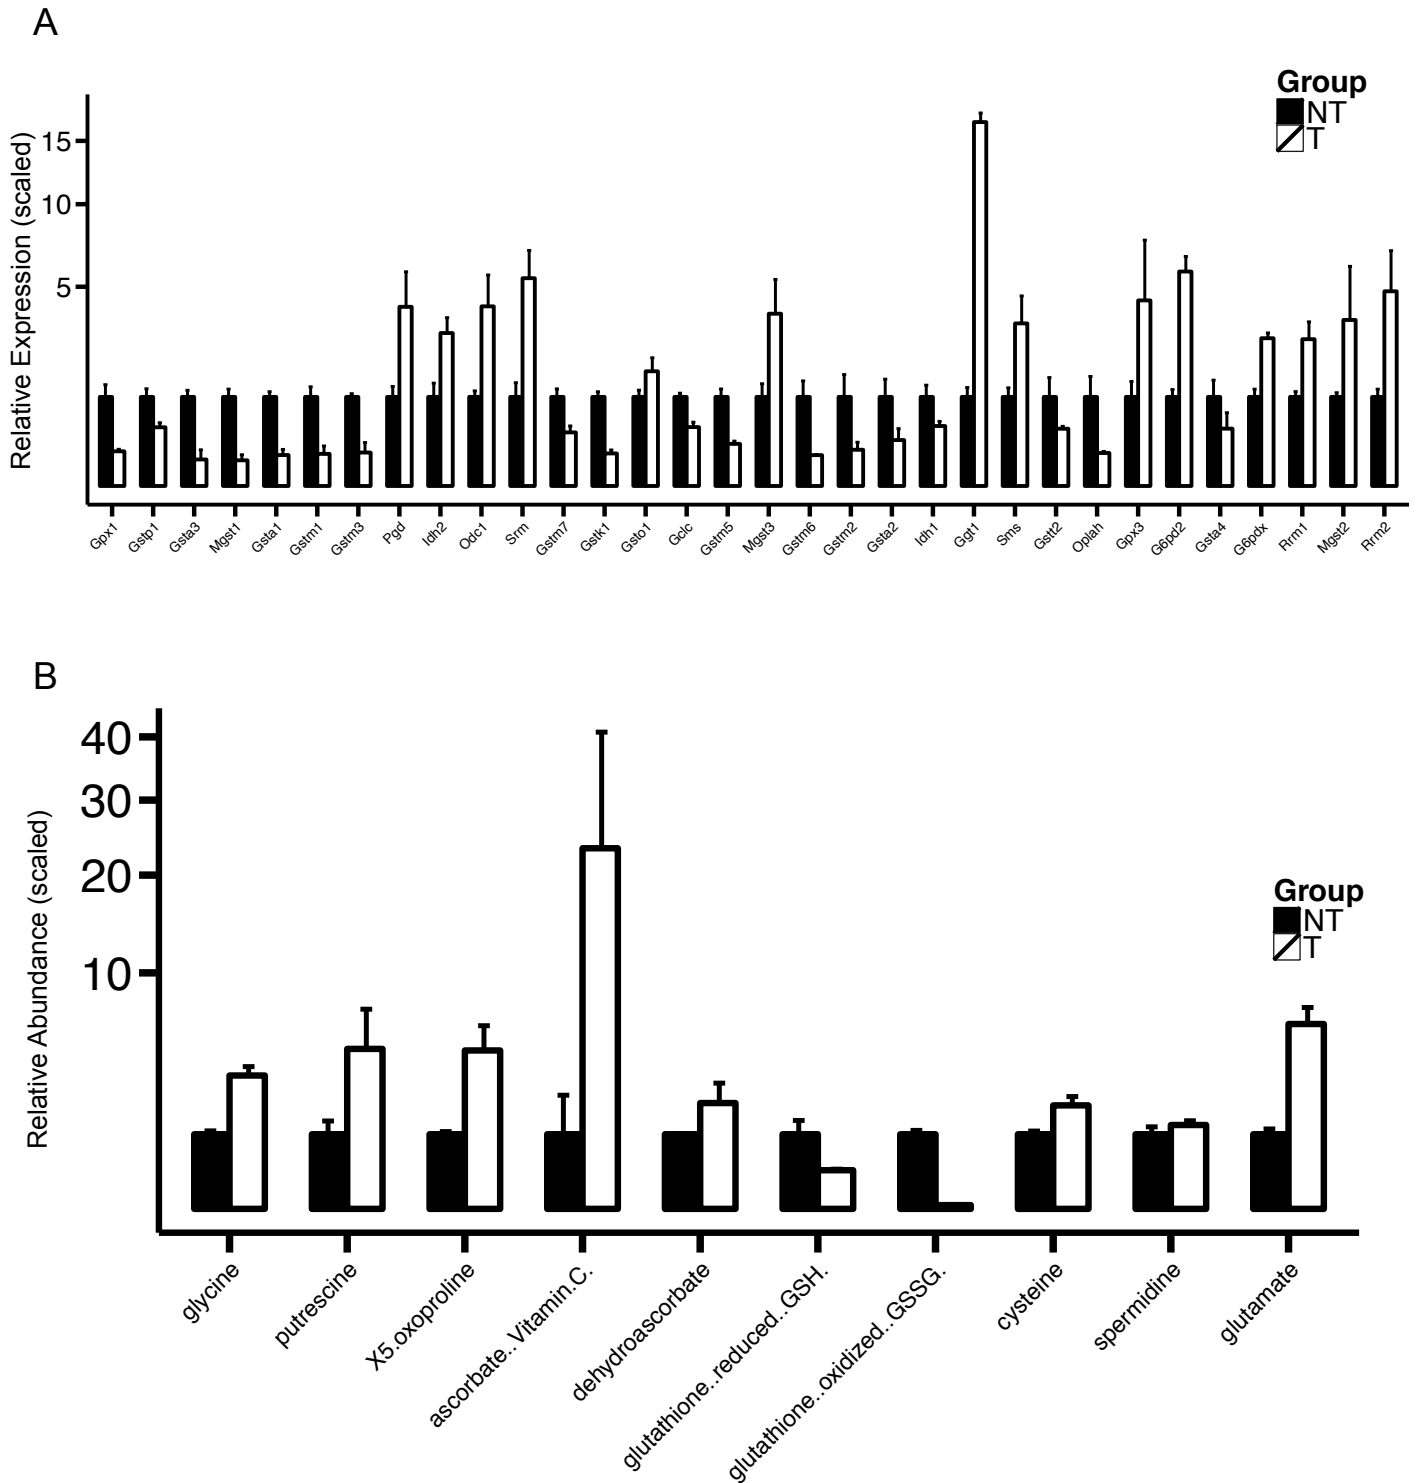

**Figure S1.** Barplots representing relative expression (A) and abundances (B) of significantly altered transcripts and metabolites, respectively, in LT2-MYC tumors compared to naïve livers, for the glutathione metabolism pathway. All data represented as normalized mean  $\pm$  SEM, unpaired two-tailed t test, FDR adjusted  $p < 0.05$ .

Glycine, serine, and threonine metabolism

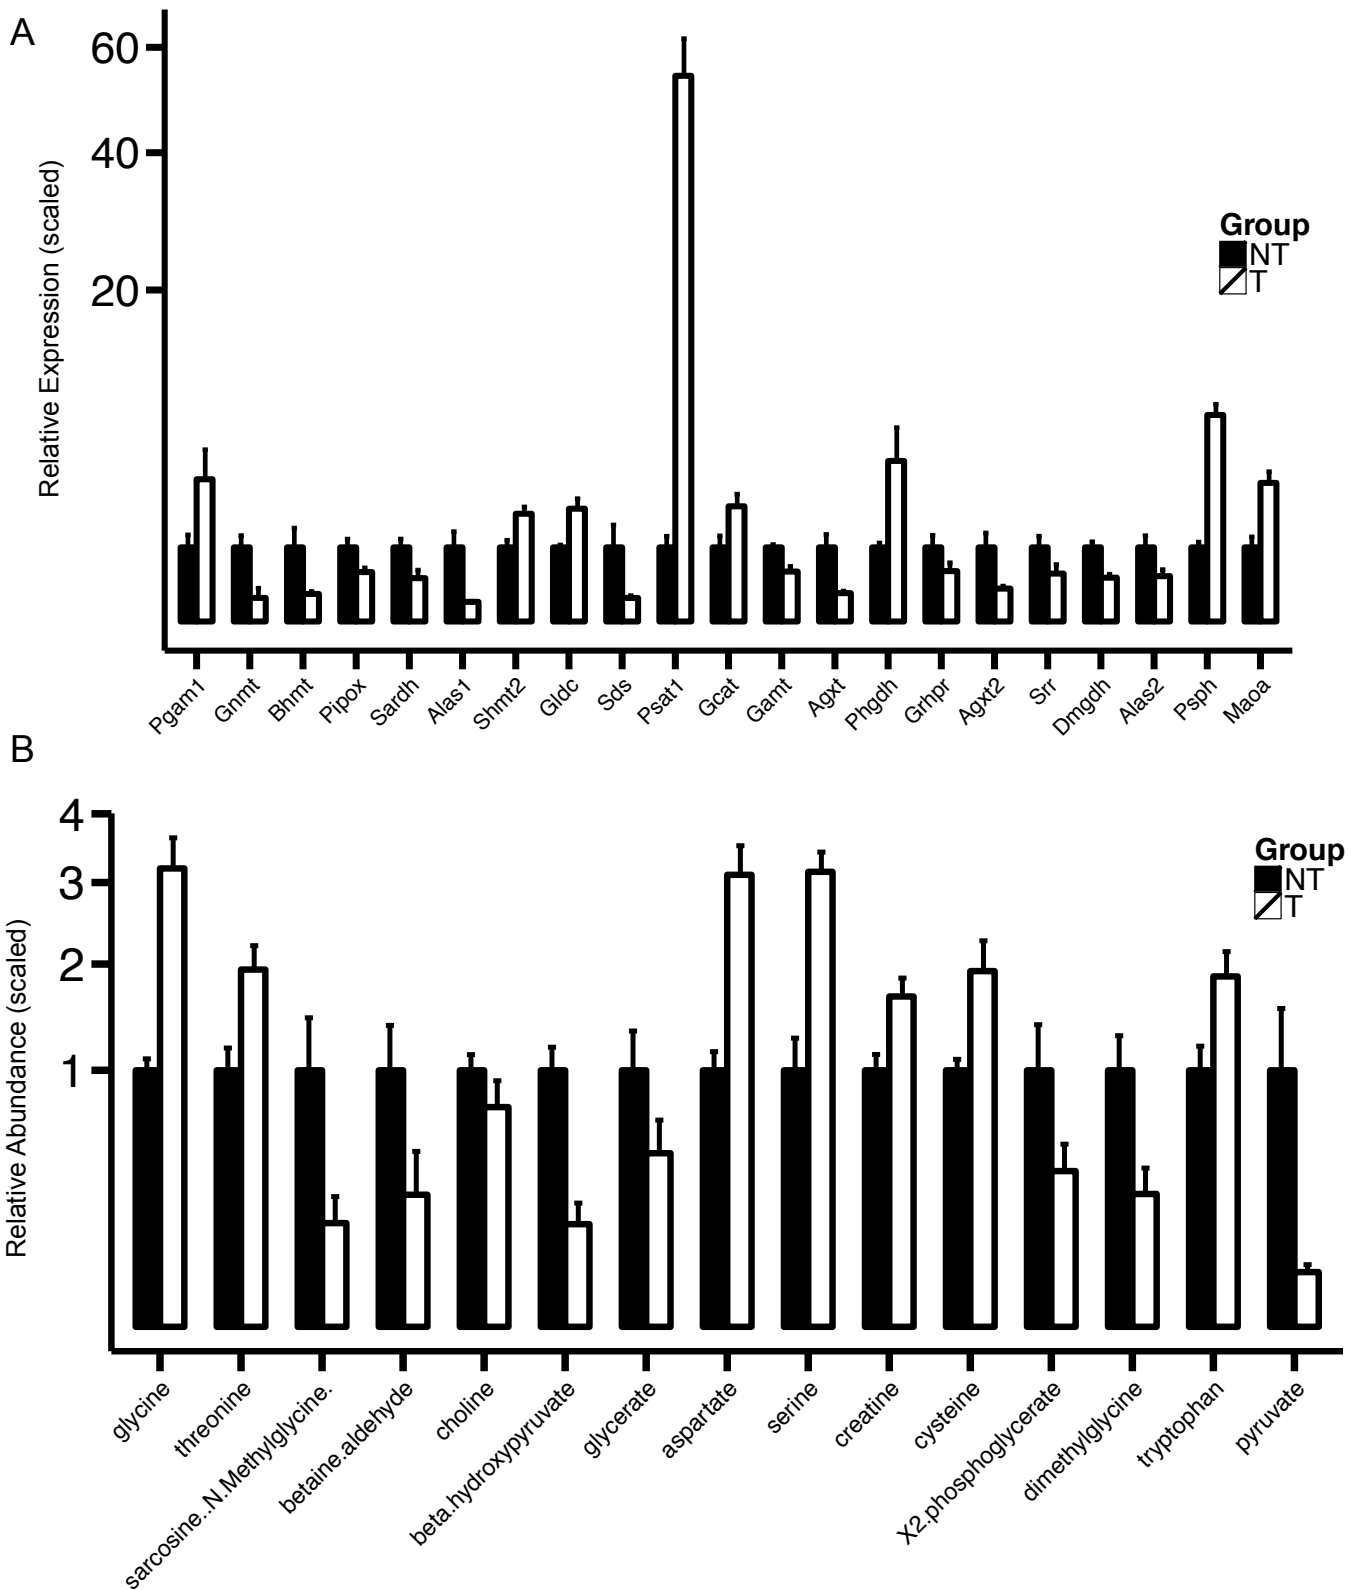

**Figure S2.** Barplots representing relative expression (A) and abundances (B) of significantly altered transcripts and metabolites, respectively, in LT2-MYC tumors compared to naïve livers, for the glycine, serine, and threonine metabolism pathway. All data represented as normalized mean  $\pm$  SEM, unpaired two-tailed t test, FDR adjusted  $p < 0.05$ .

Aminoacyl-tRNA biosynthesis

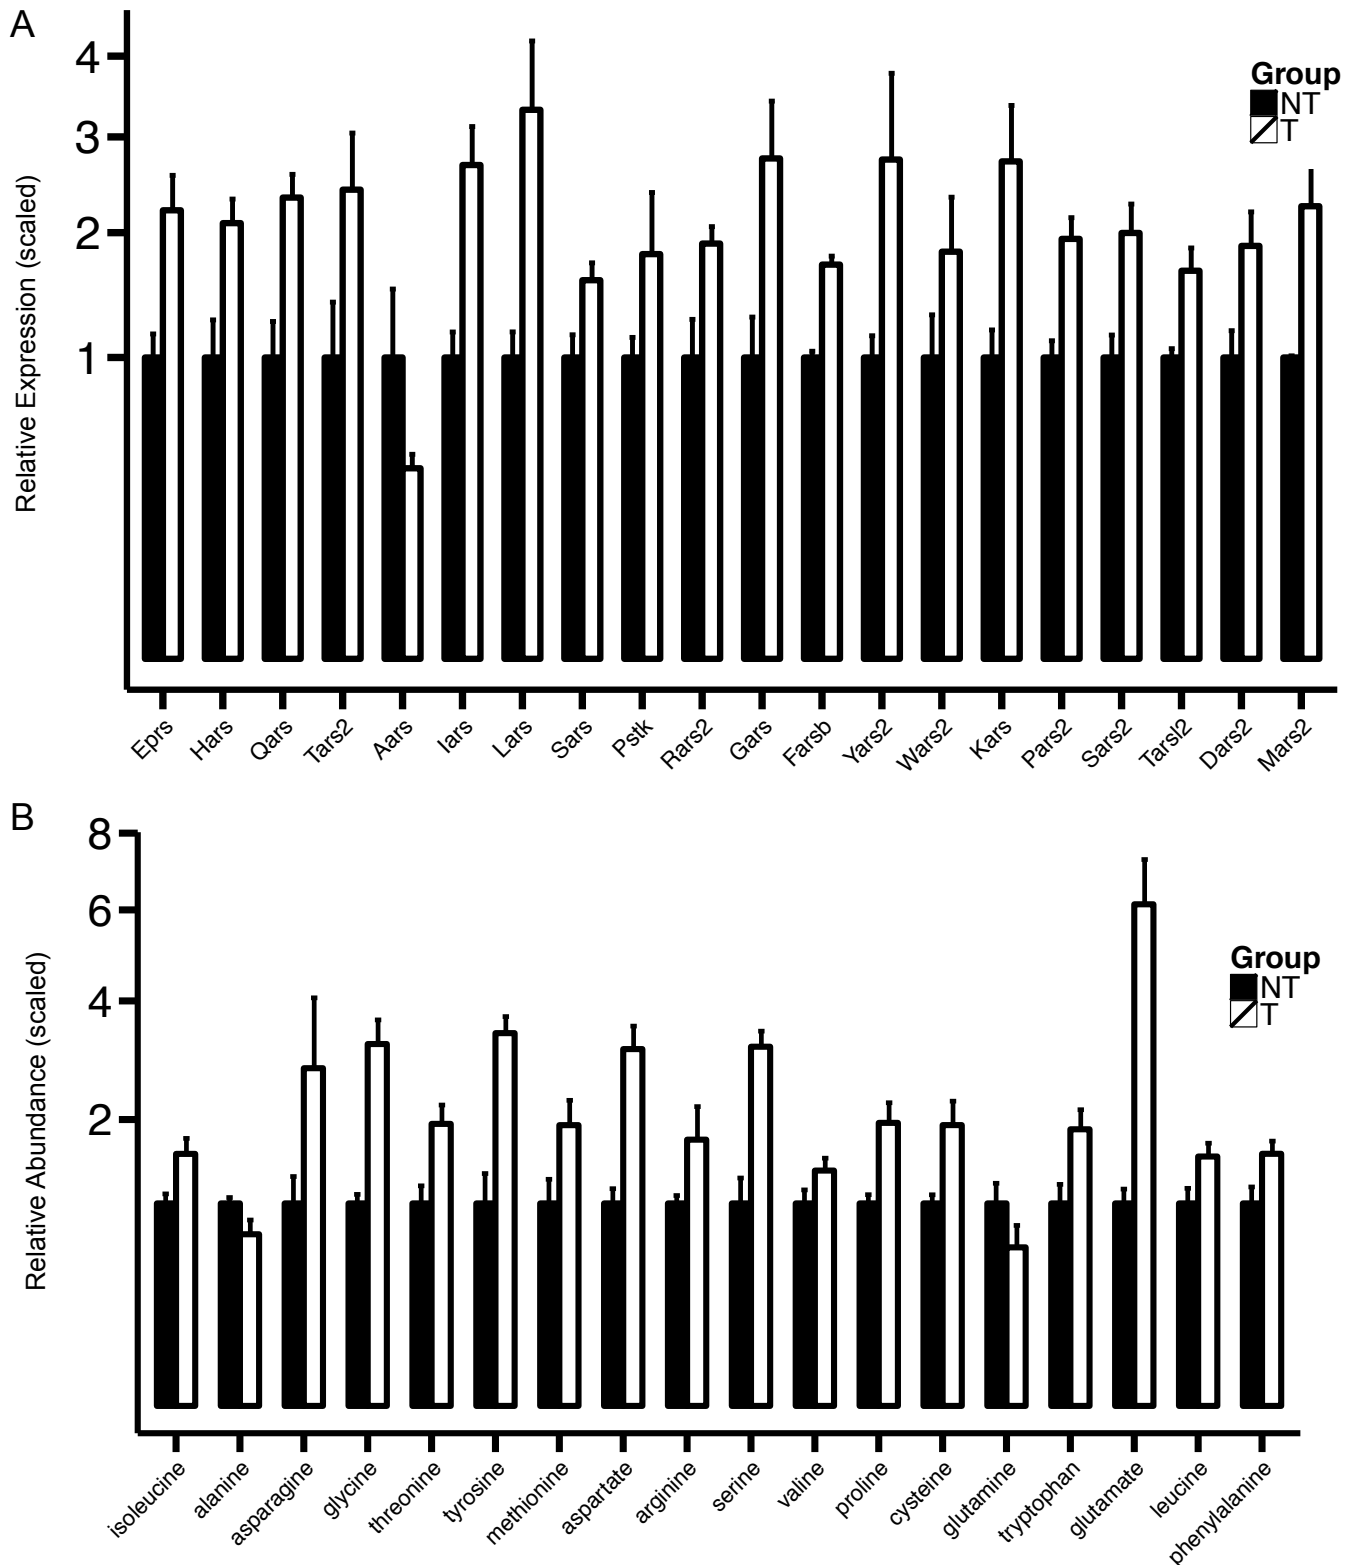

**Figure S3.** Barplots representing relative expression (A) and abundances (B) of significantly altered transcripts and metabolites, respectively, in LT2-MYC tumors compared to naïve livers, for the aminoacyl-tRNA biosynthesis pathway. All data represented as normalized mean  $\pm$  SEM, unpaired two-tailed t test, FDR adjusted  $p < 0.05$ .

Cysteine and methionine metabolism

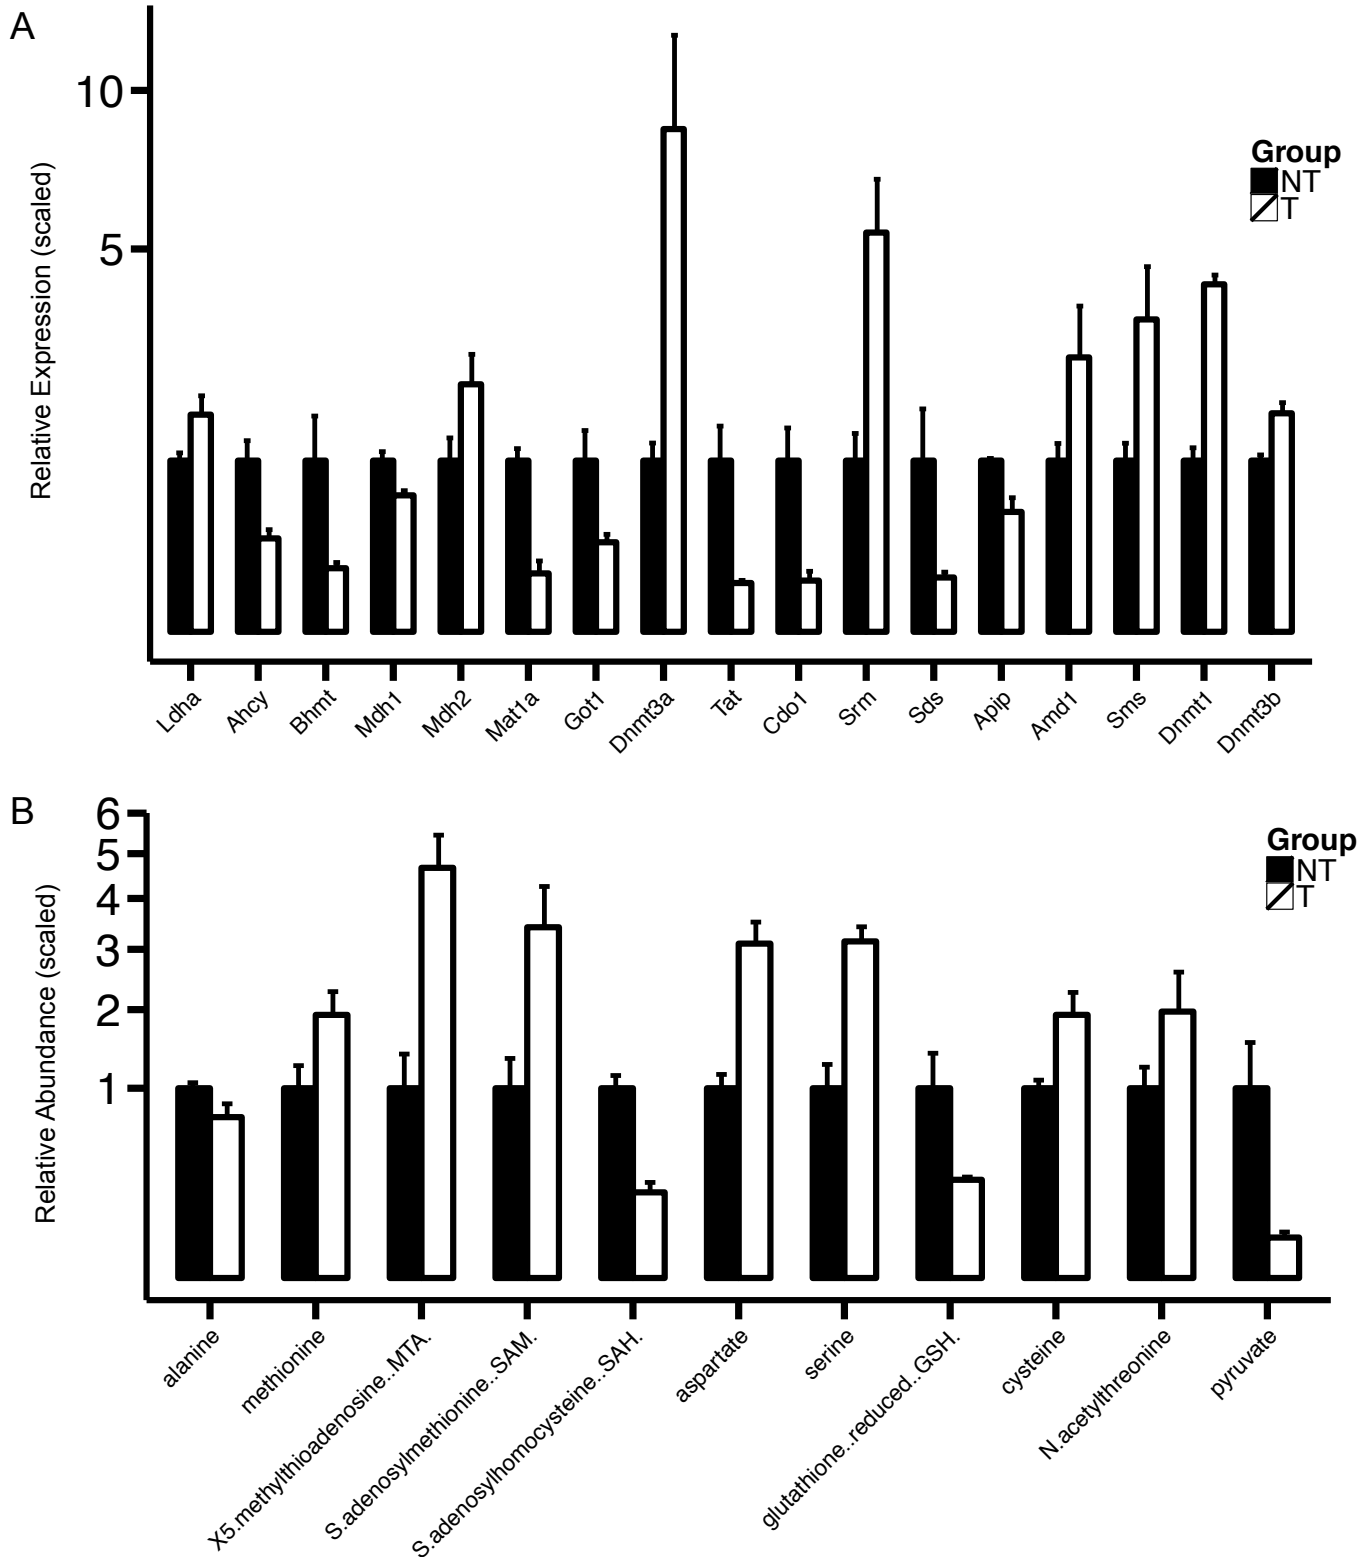

**Figure S4.** Barplots representing relative expression (A) and abundances (B) of significantly altered transcripts and metabolites, respectively, in LT2-MYC tumors compared to naive livers, the cysteine and methionine metabolism pathway. All data represented as normalized mean  $\pm$  SEM, unpaired two-tailed t test, FDR adjusted  $p < 0.05$ .

ABC transporters

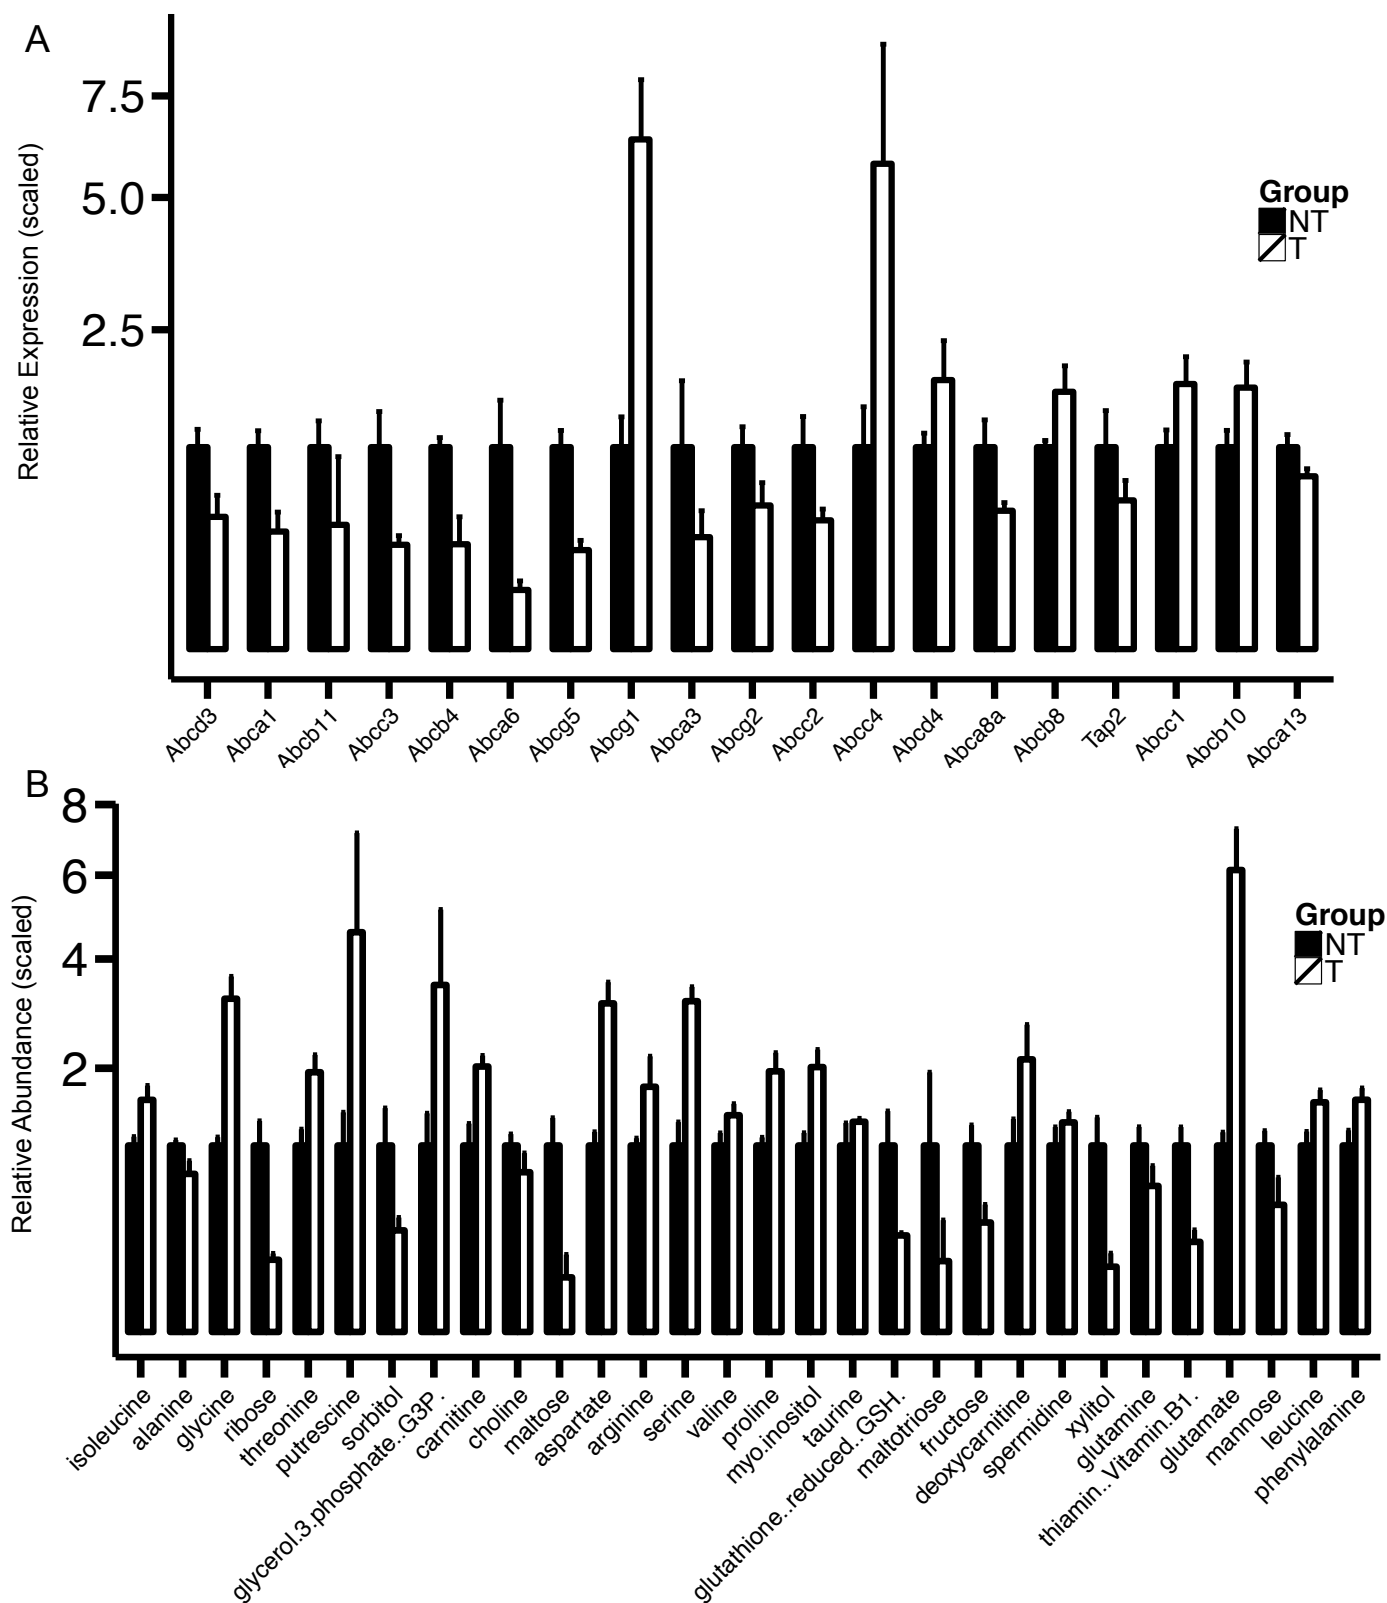

**Figure S5.** Barplots representing relative expression (A) and abundances (B) of significantly altered transcripts and metabolites, respectively, in LT2-MYC tumors compared to naïve livers, for the ABC transporters pathway. All data represented as normalized mean  $\pm$  SEM, unpaired two-tailed t test, FDR adjusted  $p < 0.05$ .

Mineral absorption

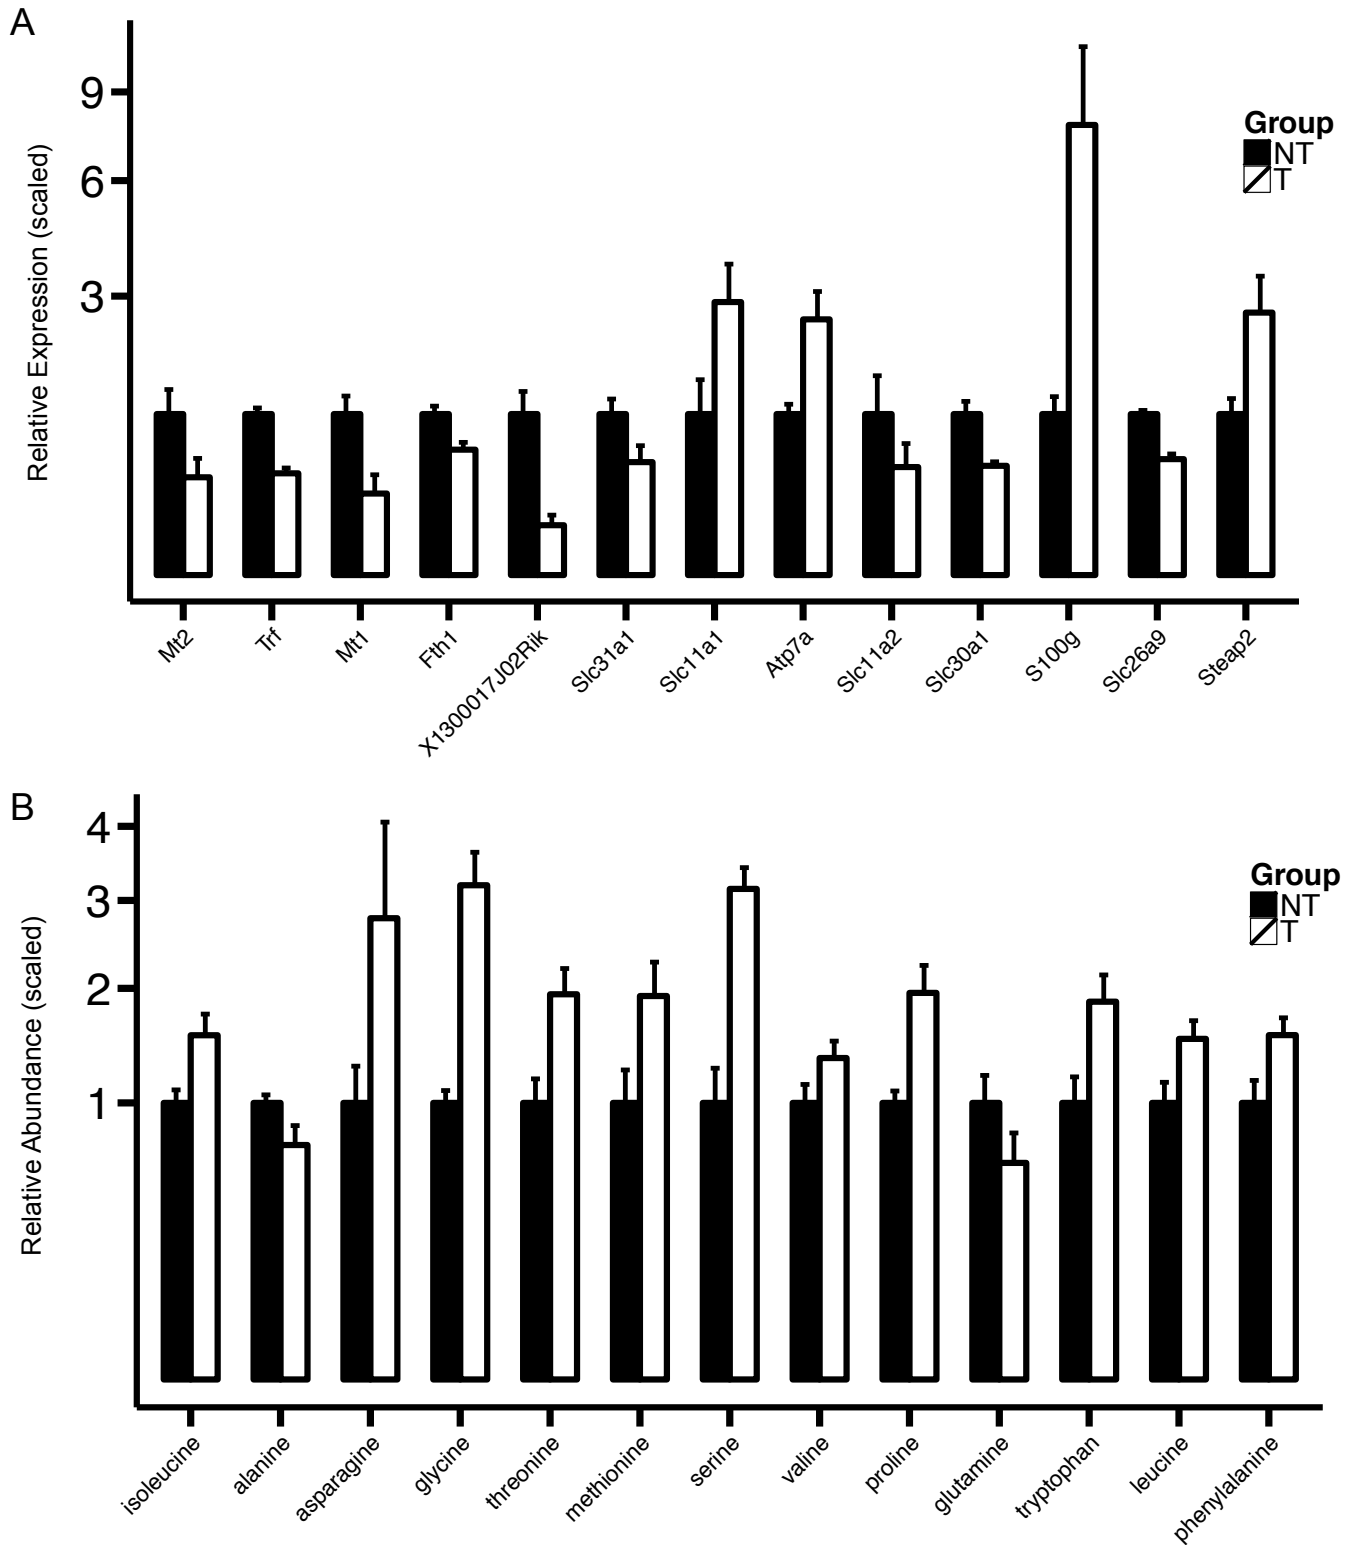

**Figure S6.** Barplots representing relative expression (A) and abundances (B) of significantly altered transcripts and metabolites, respectively, in LT2-MYC tumors compared to naïve livers, for the mineral absorption pathway. All data represented as normalized mean  $\pm$  SEM, unpaired two-tailed t test, FDR adjusted  $p < 0.05$ .

**Table S1.** Metabolic pathways overrepresented in mRNA and metabolite profiling of LT2-MYC tumors. Fisher's exact test ( $p < 0.05$ ) was performed using KEGG pathway classifications on global gene expression and metabolomics data from LT2-MYC tumors and LT2 controls.

| Kegg Pathway                             | Significantly altered mRNAs | p value  | Significantly altered metabolites | p value |
|------------------------------------------|-----------------------------|----------|-----------------------------------|---------|
| Glutathione metabolism                   | 32/52 (62%)                 | 1.05E-12 | 10/11 (91%)                       | 0.0293  |
| Glycine, serine and threonine metabolism | 21/39 (54%)                 | 2.16E-07 | 15/18 (83%)                       | 0.0304  |
| Aminoacyl-tRNA biosynthesis              | 20/44 (45%)                 | 1.25E-05 | 18/20 (90%)                       | 0.0029  |
| Cysteine and methionine metabolism       | 17/38 (45%)                 | 7.13E-05 | 11/12 (92%)                       | 0.0186  |
| ABC transporters                         | 19/46 (41%)                 | 0.0001   | 30/40 (75%)                       | 0.0276  |
| Mineral absorption                       | 13/44 (30%)                 | 0.0302   | 13/15 (87%)                       | 0.0255  |



**Table S2.** Summary output of TargetScanHuman (v6.2) predictions of GCLC 3' UTR-binding miRNAs.

| miRNA                                   | conserved sites |      |         |         | poorly conserved sites |      |         |         | Total Context score |
|-----------------------------------------|-----------------|------|---------|---------|------------------------|------|---------|---------|---------------------|
|                                         | Total           | 8mer | 7mer-m8 | 7mer-1A | Total                  | 8mer | 7mer-m8 | 7mer-1A |                     |
| miR-18ab/4735-3p                        | 1               | 1    | 0       | 0       | 0                      | 0    | 0       | 0       | -0.36               |
| miR-101/101ab                           | 1               | 0    | 0       | 1       | 1                      | 0    | 1       | 0       | -0.32               |
| miR-190/190ab                           | 0               | 0    | 0       | 0       | 1                      | 0    | 1       | 0       | -0.26               |
| miR-193/193b/193a-3p                    | 0               | 0    | 0       | 0       | 1                      | 0    | 1       | 0       | -0.25               |
| miR-15abc/16/16abc/195/322/424/497/1907 | 0               | 0    | 0       | 0       | 1                      | 0    | 1       | 0       | -0.23               |
| miR-30abcdef/30abe-5p/384-5p            | 1               | 0    | 1       | 0       | 0                      | 0    | 0       | 0       | -0.19               |
| miR-216b/216b-5p                        | 0               | 0    | 0       | 0       | 2                      | 0    | 1       | 1       | -0.18               |
| miR-148ab-3p/152                        | 0               | 0    | 0       | 0       | 1                      | 0    | 0       | 1       | -0.16               |
| miR-133abc                              | 1               | 0    | 0       | 1       | 0                      | 0    | 0       | 0       | -0.16               |
| miR-24/24ab/24-3p                       | 0               | 0    | 0       | 0       | 1                      | 0    | 0       | 1       | -0.15               |
| miR-135ab/135a-5p                       | 1               | 0    | 1       | 0       | 0                      | 0    | 0       | 0       | -0.15               |
| miR-196abc                              | 0               | 0    | 0       | 0       | 1                      | 0    | 1       | 0       | -0.15               |
| miR-26ab/1297/4465                      | 0               | 0    | 0       | 0       | 2                      | 0    | 0       | 2       | -0.13               |
| miR-122/122a/1352                       | 0               | 0    | 0       | 0       | 1                      | 0    | 0       | 1       | -0.13               |
| miR-1ab/206/613                         | 1               | 0    | 0       | 1       | 0                      | 0    | 0       | 0       | -0.12               |
| miR-25/32/92abc/363/363-3p/367          | 0               | 0    | 0       | 0       | 1                      | 0    | 0       | 1       | -0.1                |
| miR-144                                 | 1               | 0    | 0       | 1       | 0                      | 0    | 0       | 0       | -0.1                |
| miR-137/137ab                           | 0               | 0    | 0       | 0       | 1                      | 0    | 0       | 1       | -0.08               |
| miR-216a                                | 0               | 0    | 0       | 0       | 1                      | 0    | 0       | 1       | -0.04               |

TargetScanHuman, v6.2

**Table S3.** Summary of miRNA candidate expression in LT2 MYC tumors versus nontumor control liver. Data collection and statistical analysis described in [24].

| Probe_ID           | MicroRNA_Accession | LT2 MYC vs LT2<br>Ctrl_Log2Diff | LT2 MYC vs LT2<br>Ctrl_ttest | FDR        |
|--------------------|--------------------|---------------------------------|------------------------------|------------|
| hsa-miR-18a_st1    | MIMAT0000072       | 5.699199283                     | 0.005656969                  | 0.02765629 |
| hsa-miR-18b_st1    | MIMAT0001412       | 4.609599217                     | 0.000805997                  | 0.01472791 |
| hsa-miR206_st1     | NA                 | 4.310055985                     | 0.000240788                  | 0.01059467 |
| hsa-miR-18a-_st1   | MIMAT0002891       | 3.281603521                     | 0.001129219                  | 0.01472791 |
| hsa-miR-363-_st1   | MIMAT0003385       | 2.353559808                     | 0.001811416                  | 0.01472791 |
| mmu-miR-424_st2    | MIMAT0000548       | 1.128166698                     | 0.07236114                   | 0.1799961  |
| mmu-miR-363_st2    | MIMAT0000708       | 0.953840582                     | 0.422043475                  | 0.5533693  |
| hsa-miR-133a_st1   | MIMAT0000427       | 0.775241322                     | 0.427603581                  | 0.5533693  |
| hsa-miR-497_st1    | MIMAT0002820       | 0.598273038                     | 0.427336574                  | 0.5533693  |
| hsa-miR-195_st2    | MIMAT0000461       | 0.54402918                      | 0.11023725                   | 0.2108887  |
| hsa-miR-25_st2     | MIMAT0000081       | 0.492606988                     | 0.105356606                  | 0.2107132  |
| hsa-miR-206_st2    | MIMAT0000462       | 0.338189617                     | 0.678468901                  | 0.7654521  |
| hsa-miR-92b_st1    | MIMAT0003218       | 0.173084081                     | 0.703613719                  | 0.7739751  |
| hsa-miR30_st1      | MIMAT0003218       | 0.144603505                     | 0.735305352                  | 0.783335   |
| hsa-miR135_st2     | NA                 | 0.037548424                     | 0.963089119                  | 0.9630891  |
| hsa-miR-152_st1    | MIMAT0000438       | -0.069132592                    | 0.791092009                  | 0.8094895  |
| hsa-miR-24_st1     | MIMAT0000080       | -0.142812998                    | 0.608518483                  | 0.7046003  |
| hsa-miR-148b_st2   | MIMAT0000759       | -0.228524171                    | 0.490500587                  | 0.5995007  |
| hsa-miR-92_st1     | MIMAT0000092       | -0.23646842                     | 0.206548133                  | 0.336597   |
| mmu-miR-322_st2    | MIMAT0000549       | -0.23704298                     | 0.475595848                  | 0.5978919  |
| hsa-miR-137_st1    | MIMAT0000429       | -0.319967546                    | 0.747728802                  | 0.783335   |
| hsa-miR-32_st1     | MIMAT0000090       | -0.384600313                    | 0.13273963                   | 0.243356   |
| hsa-miR-30e-5p_st2 | MIMAT0000692       | -0.397422028                    | 0.40977261                   | 0.5533693  |
| hsa-miR-15b_st1    | MIMAT0000417       | -0.412584831                    | 0.351321823                  | 0.53304    |
| hsa-miR-190_st1    | MIMAT0000458       | -0.449961251                    | 0.519155739                  | 0.6173744  |
| hsa-miR-26b_st1    | MIMAT0000083       | -0.533147329                    | 0.102246677                  | 0.2107132  |
| hsa-miR-30b_st2    | MIMAT0000420       | -0.629193097                    | 0.178651211                  | 0.3023328  |
| hsa-miR-16_st2     | MIMAT0000069       | -0.728576809                    | 0.011194195                  | 0.04925446 |
| hsa-miR-384_st1    | MIMAT0001075       | -0.748400032                    | 0.369486507                  | 0.5419135  |
| hsa-miR-15a_st1    | MIMAT0000068       | -0.773857833                    | 0.105121924                  | 0.2107132  |
| hsa-miR-30c_st1    | MIMAT0000244       | -0.785497581                    | 0.01445595                   | 0.05297318 |
| hsa-miR-30a-5p_st2 | MIMAT0000087       | -0.858964008                    | 0.028126344                  | 0.08839708 |
| hsa-miR-101_st1    | MIMAT0000099       | -0.929845649                    | 0.166367744                  | 0.2928072  |
| mmu-miR-30e-_st2   | MIMAT0000249       | -0.955060676                    | 0.015651166                  | 0.05297318 |
| hsa-miR-144_st1    | MIMAT0000436       | -0.979559768                    | 0.234576007                  | 0.3686194  |
| hsa-miR-30d_st1    | MIMAT0000245       | -1.042143704                    | 0.004811522                  | 0.02646337 |
| hsa-miR-30e-3p_st1 | MIMAT0000693       | -1.05473302                     | 0.014541182                  | 0.05297318 |
| hsa-miR-193a_st1   | MIMAT0000459       | -1.055925472                    | 0.076430924                  | 0.1799961  |
| hsa-miR-26a_st2    | MIMAT0000082       | -1.118272573                    | 0.002008351                  | 0.01472791 |
| hsa-miR-122a_st1   | MIMAT0000421       | -1.224268723                    | 0.002563254                  | 0.01611188 |
| hsa-miR-30a-3p_st1 | MIMAT0000088       | -1.254547385                    | 0.001340722                  | 0.01472791 |
| mmu-miR-101b_st1   | MIMAT0000616       | -1.53018606                     | 0.033931224                  | 0.0995316  |
| hsa-miR-1_st1      | MIMAT0000416       | -1.724874854                    | 0.077725586                  | 0.1799961  |
| hsa-miR-148a_st1   | MIMAT0000243       | -2.323421889                    | 0.060621178                  | 0.1667082  |

**Table S4.** Summary of MYC-dependent regulation of glutathione pathway genes. Columns 2-5 represent data described in [45]. 'Protein Expression' column summarizes Western Blot data in Figure 2D of this study.

| Gene  | Myc_indep_UP | Myc_dep_UP | Myc_indep_DN | Myc_dep_DN | Protein Expression                                       |
|-------|--------------|------------|--------------|------------|----------------------------------------------------------|
| Gclc  | no           | no         | yes          | no         | Dramatically decreased in tumors ( $p < 0.001$ )         |
| Ggt1  | yes          | no         | no           | no         | Very small, but significant, increase                    |
| Gss   | no           | no         | no           | no         | No change                                                |
| Glx5  | no           | no         | no           | no         | Large increase, significant at $p < 0.10$                |
| Gsr   | no           | no         | no           | no         | Very large increase, very significant                    |
| G6pdx | yes          | no         | no           | no         | Very large increase, very significant                    |
| Gls   | no           | yes        | no           | no         | Previously shown to be upregulated (Yuneva et al 2012)   |
| Gls2  | no           | no         | yes          | no         | Previously shown to be downregulated (Yuneva et al 2012) |
