# Supplementary material
Source: PubMed Central journal article supplement (PMC5376764)

Figure 2D - GSS

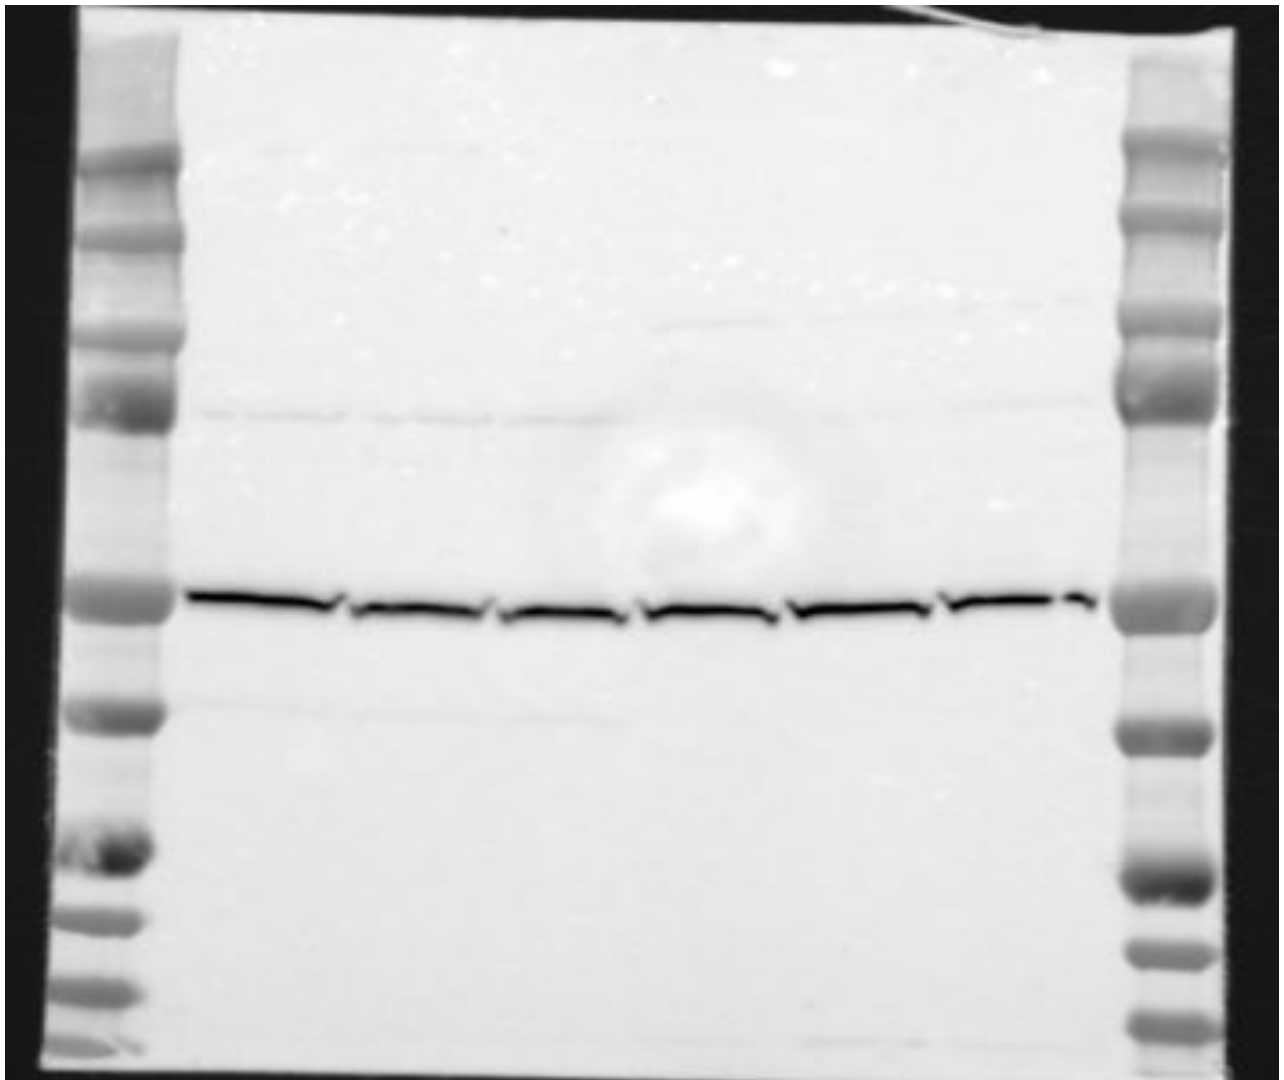

Figure 2D – GLRX5

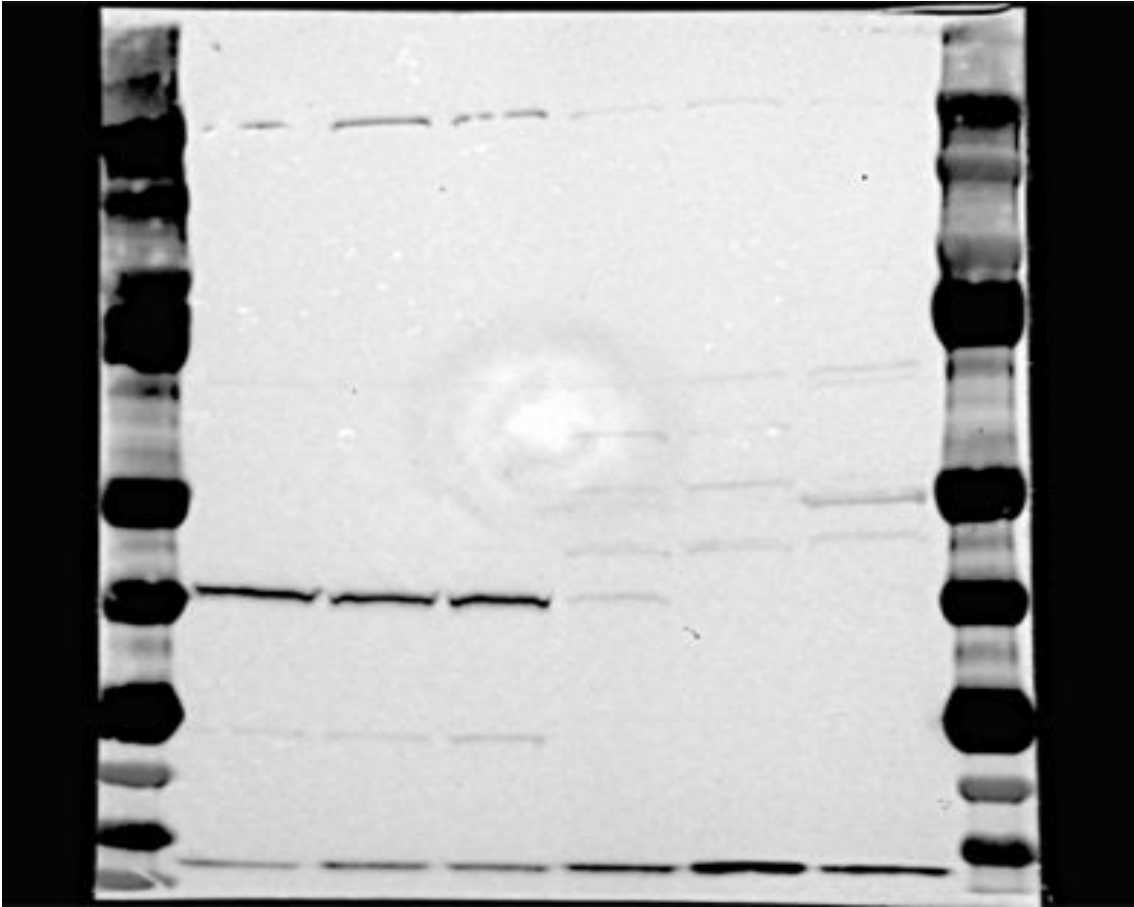

Figure 2D – Ponceau (left, top and middle)

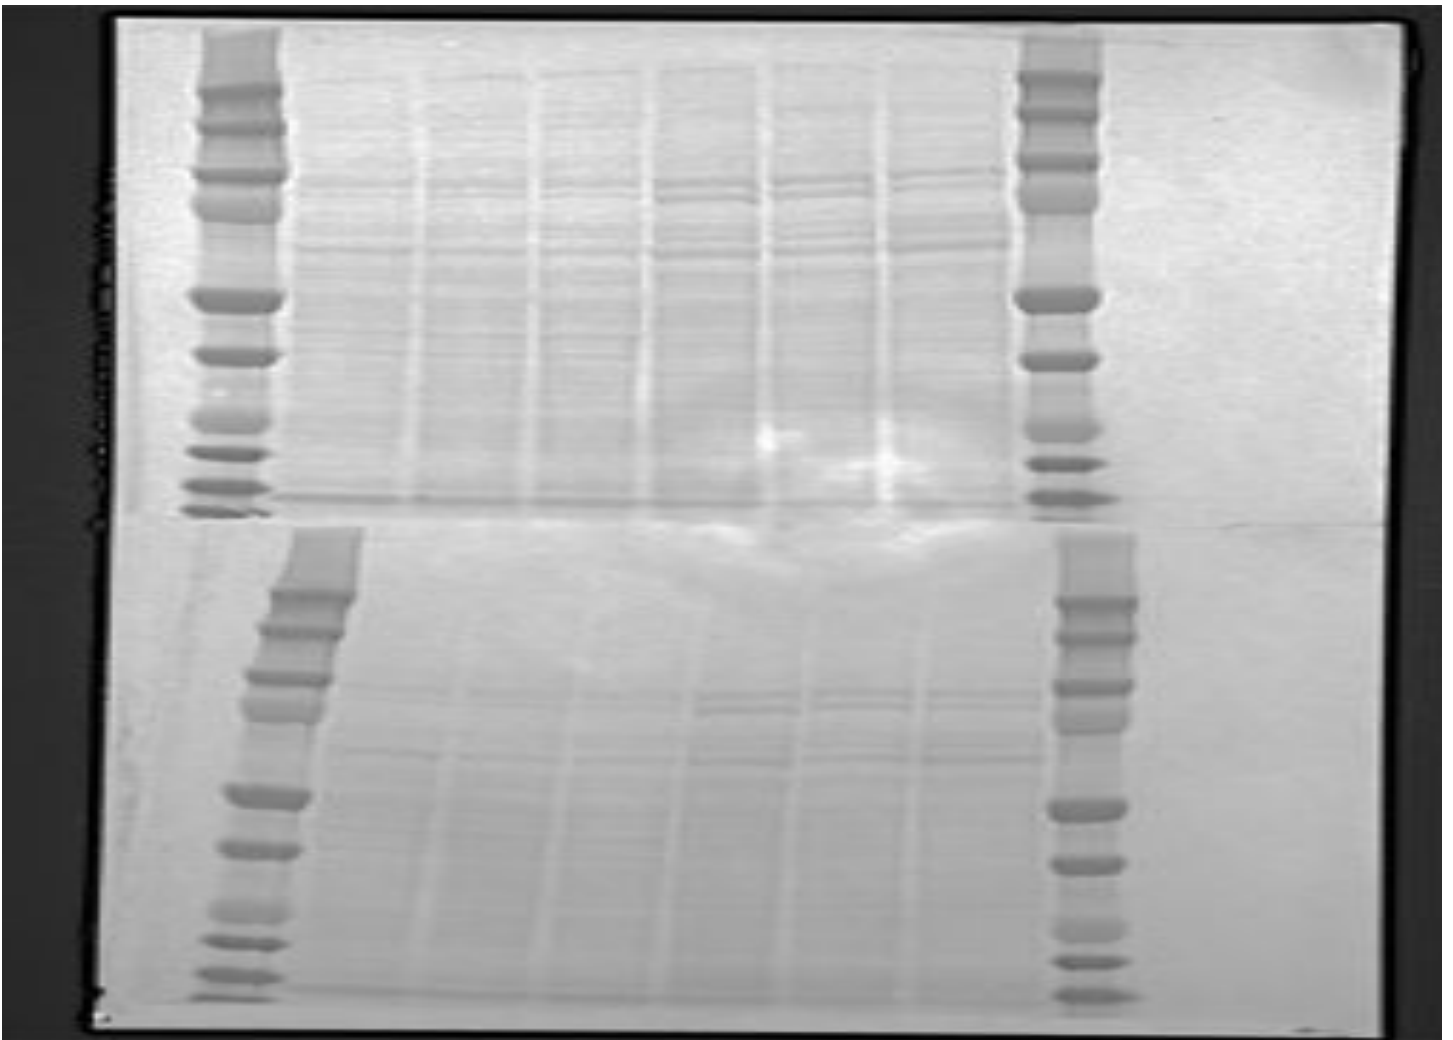

Figure 2D – GGT1

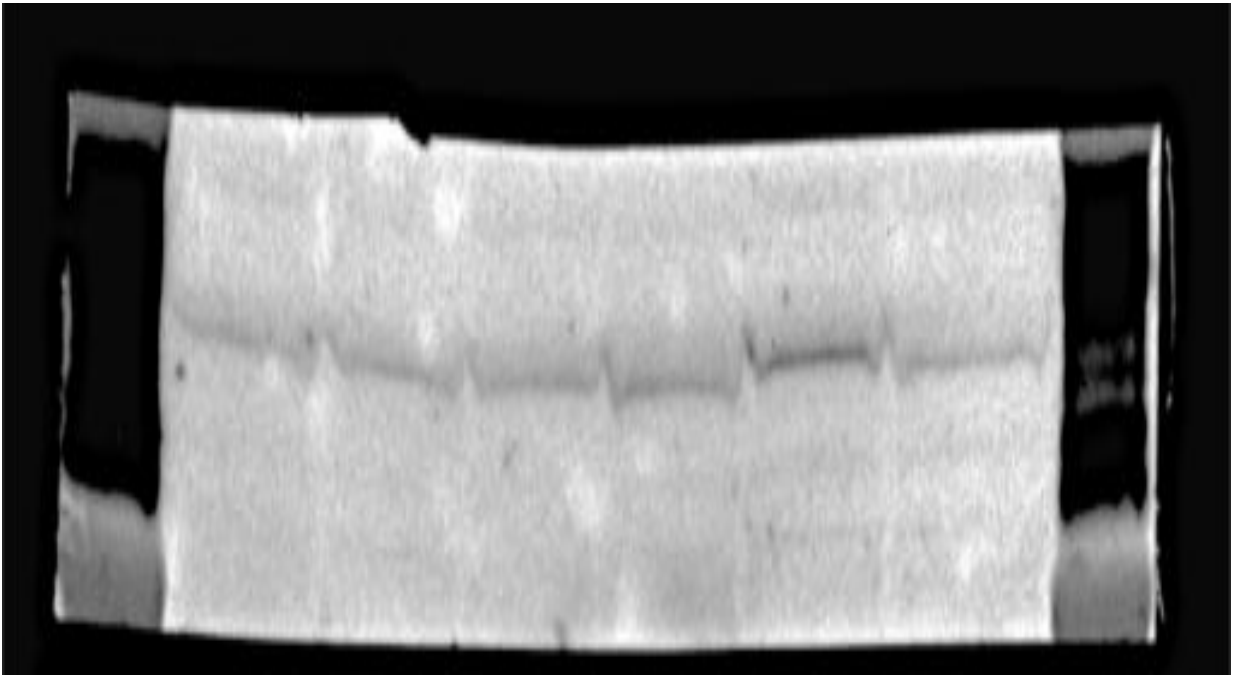

Figure 2D - GSR

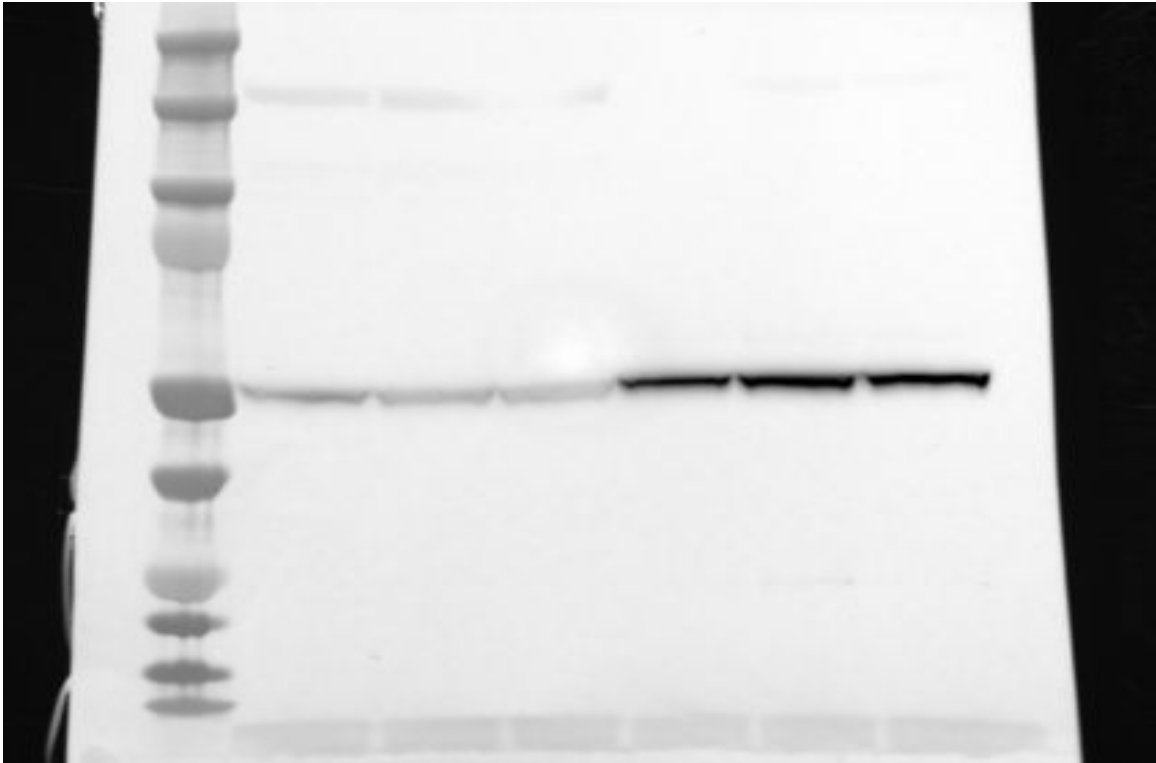

Figure 2D – Ponceau (left, bottom)

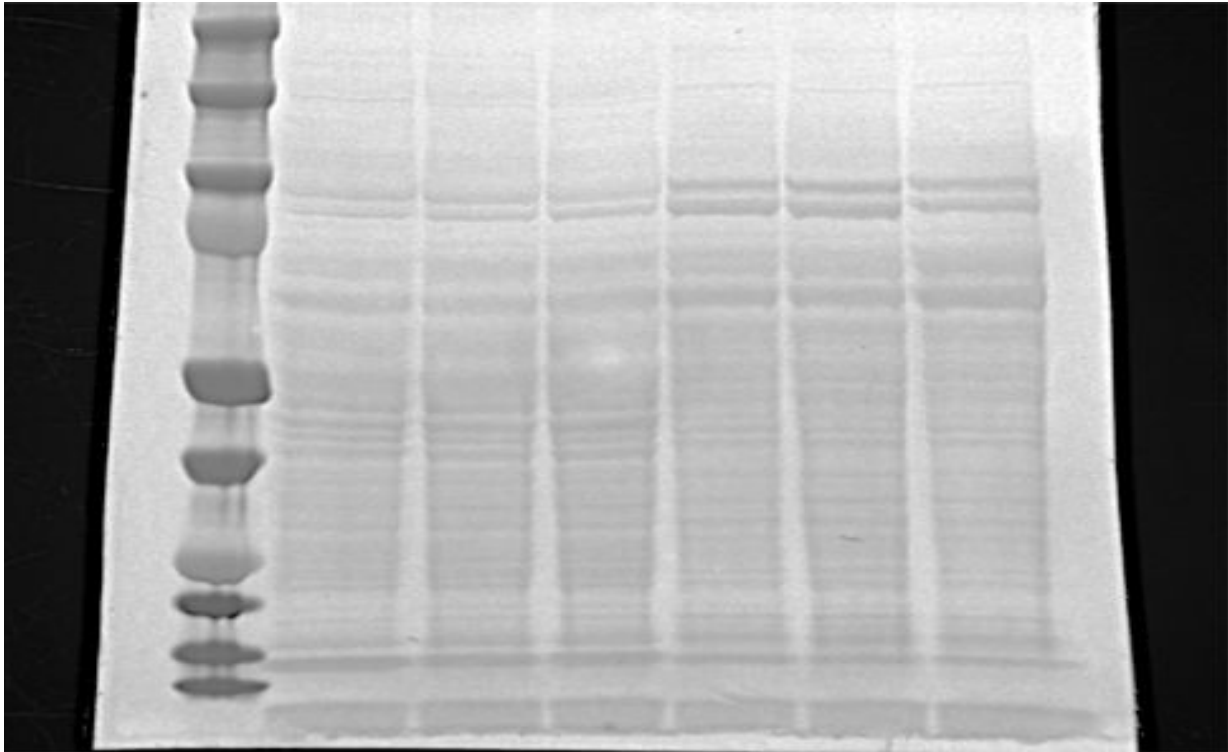

Figure 2D – G6PDH

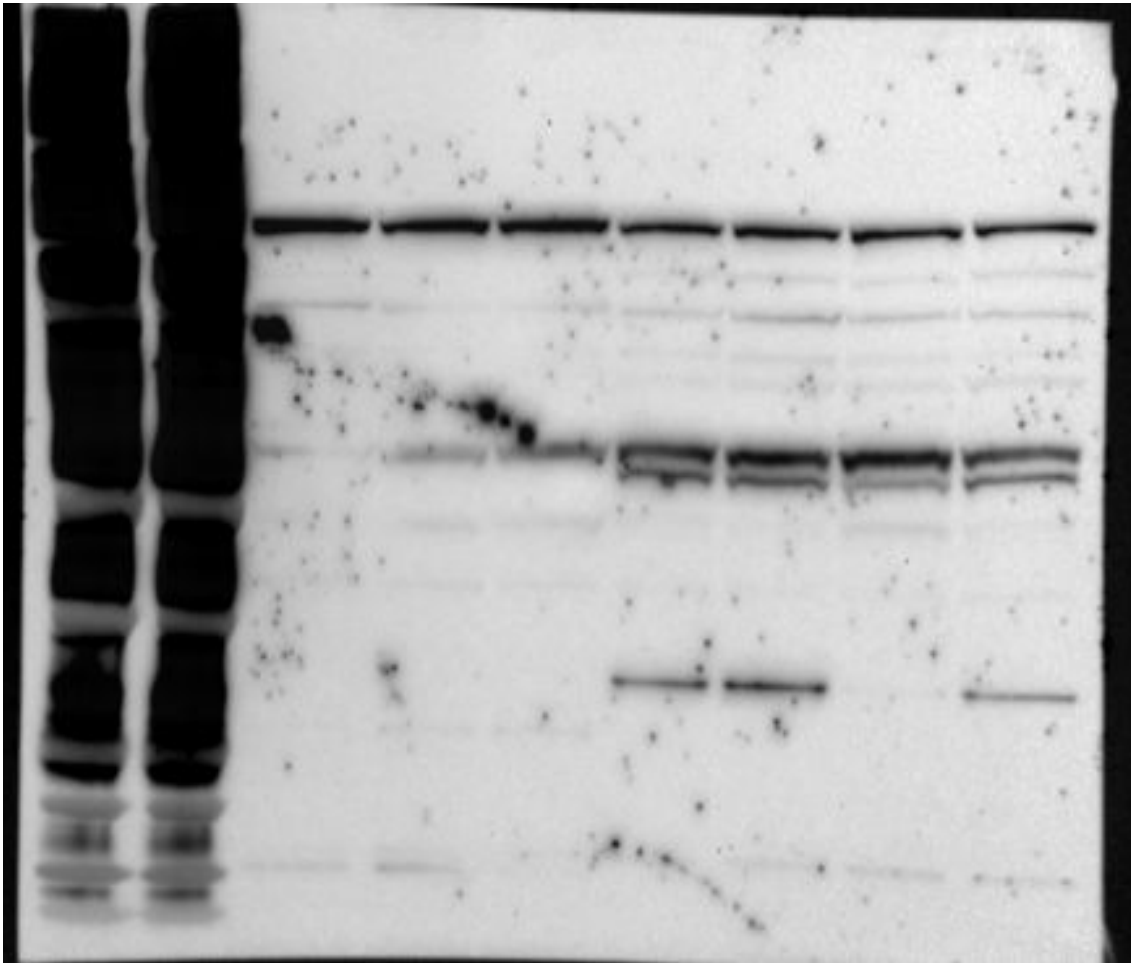

Figure 2D – Ponceau (right, top)

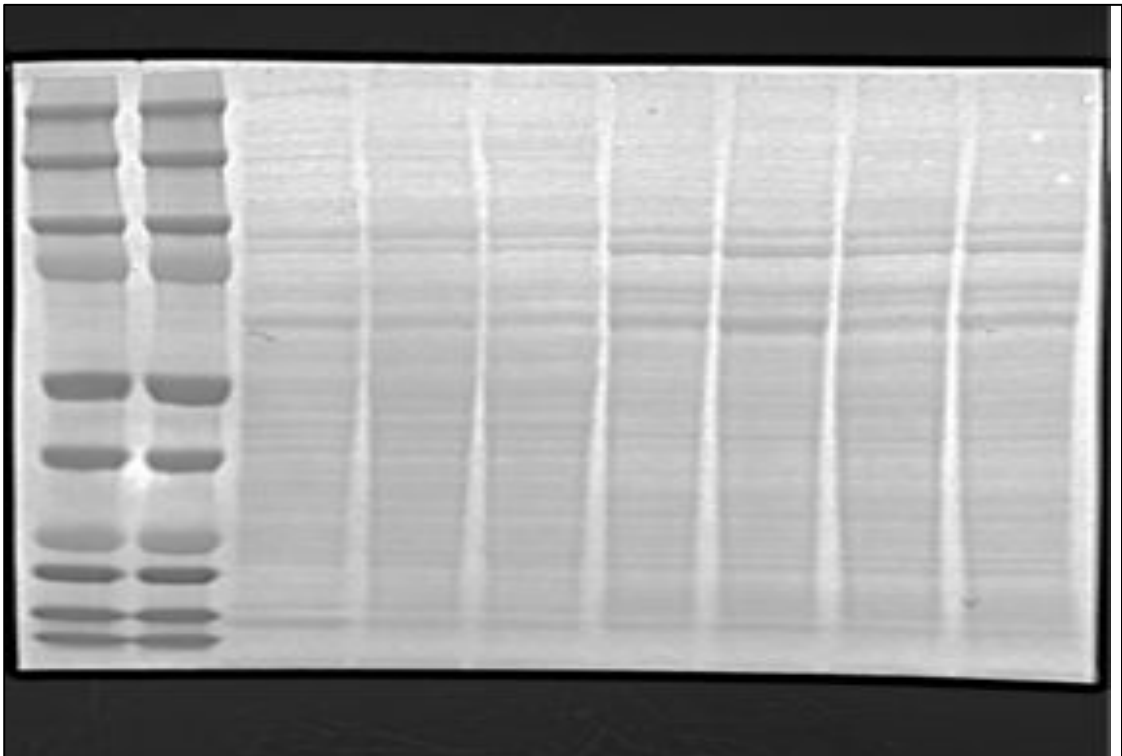



Figure 2D - GCLC

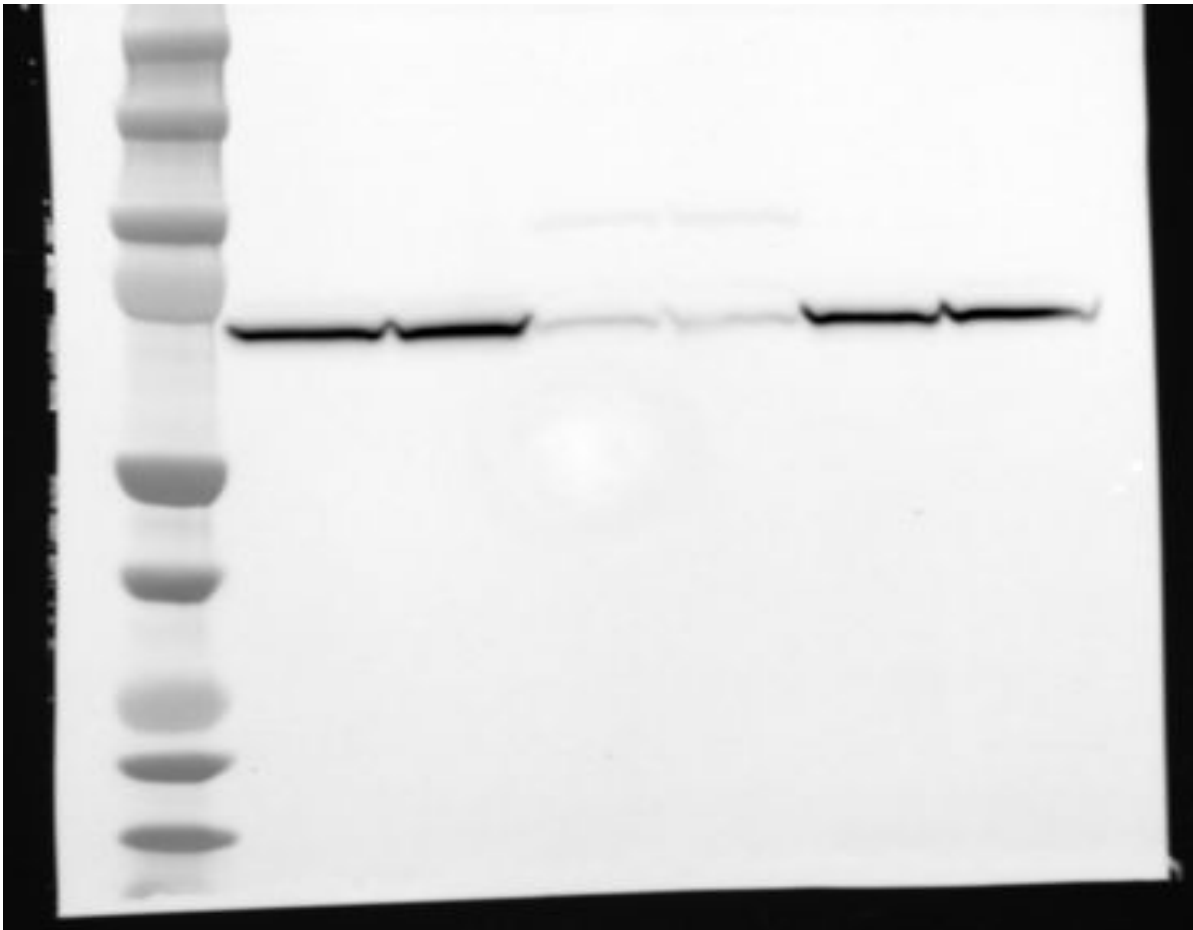

Figure 2D – Ponceau (right, bottom)

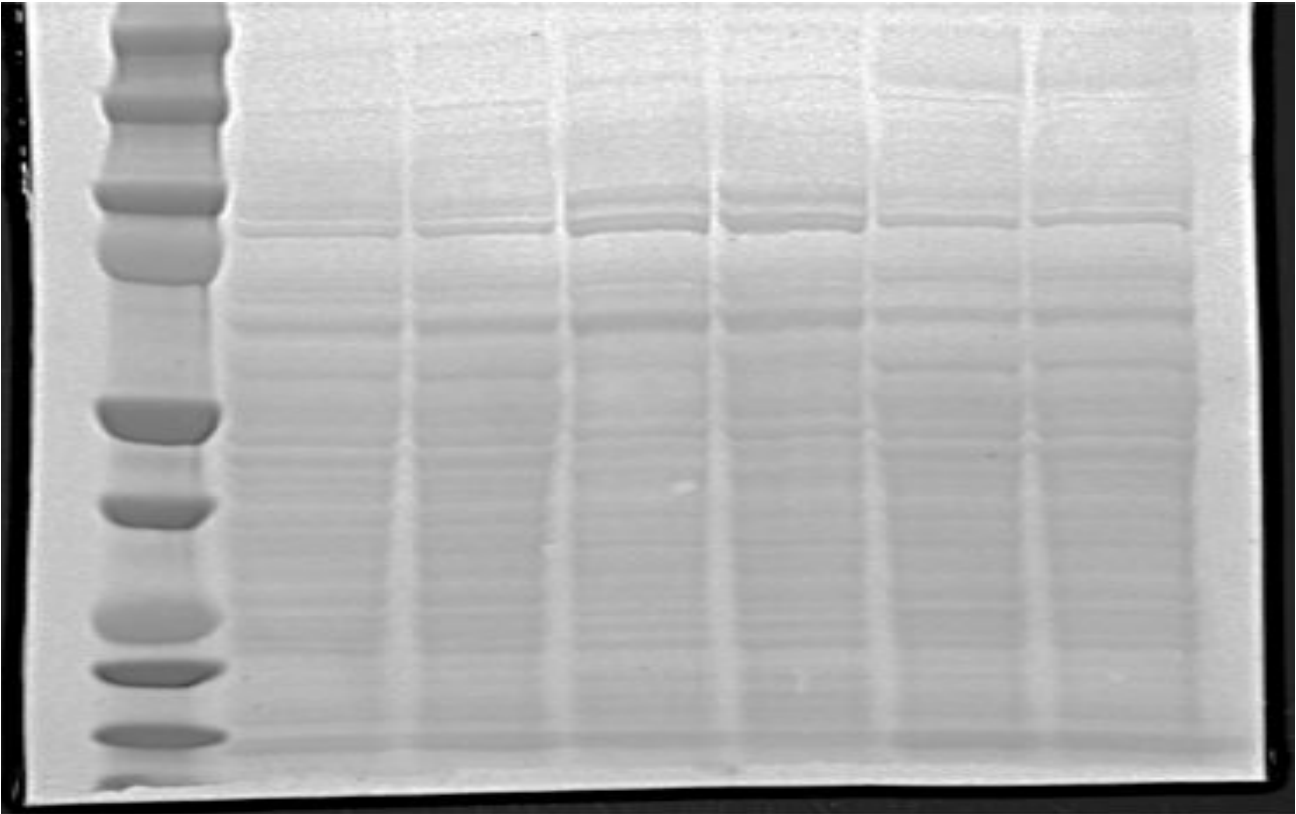

Supplement: EMBR-18-569-s005.pdf [file EMBR-18-569-s005.pdf]
