# Supplementary material
Source: PubMed Central journal article supplement (PMC5376764)

Figure 3A - GCLC

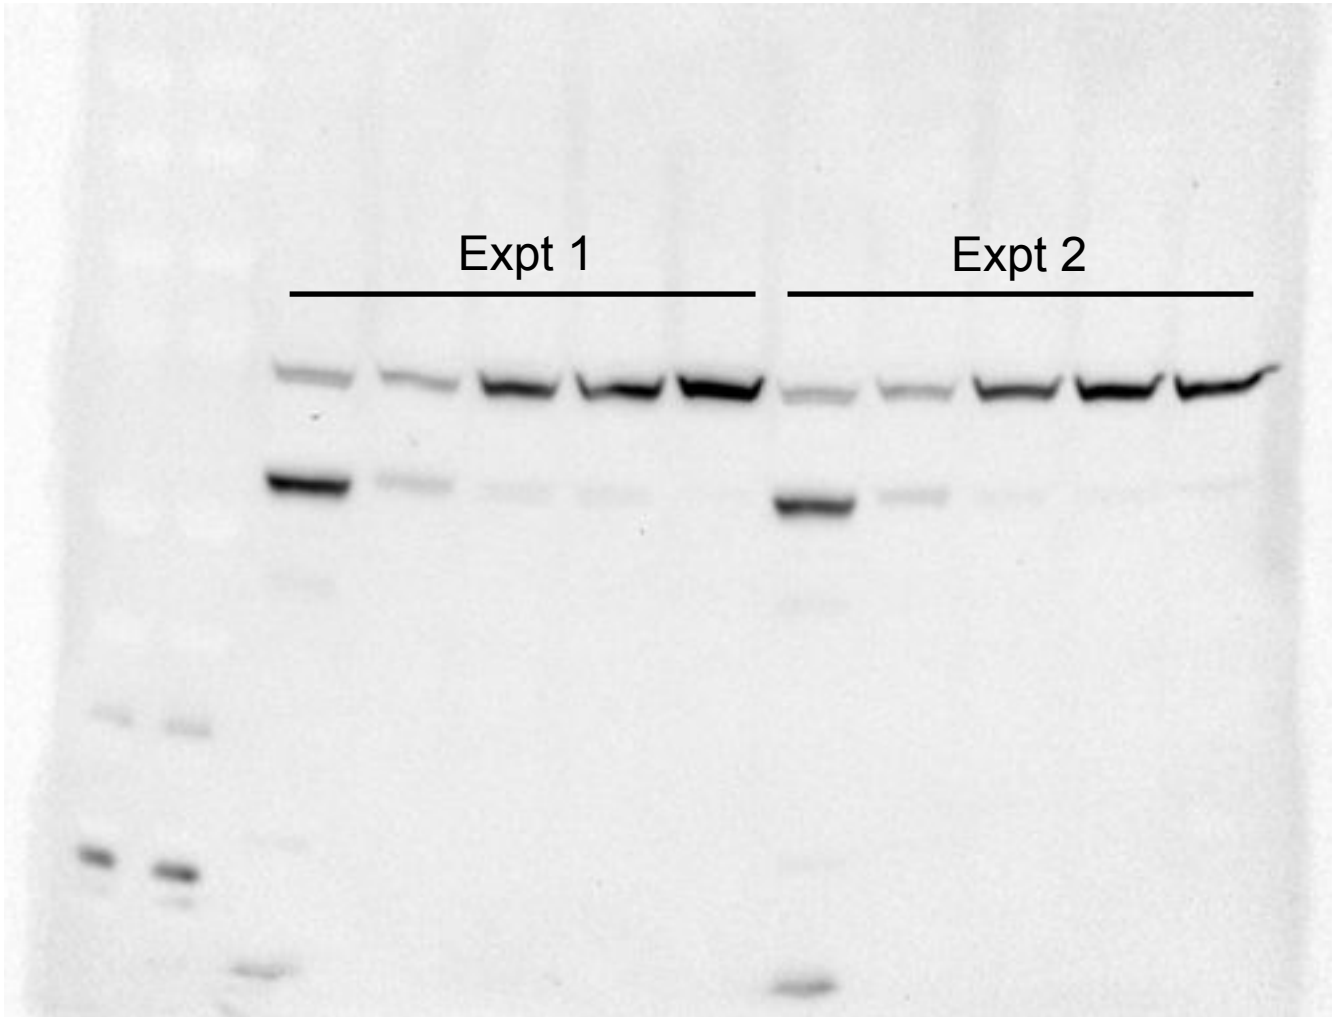

Figure 3A - MYC

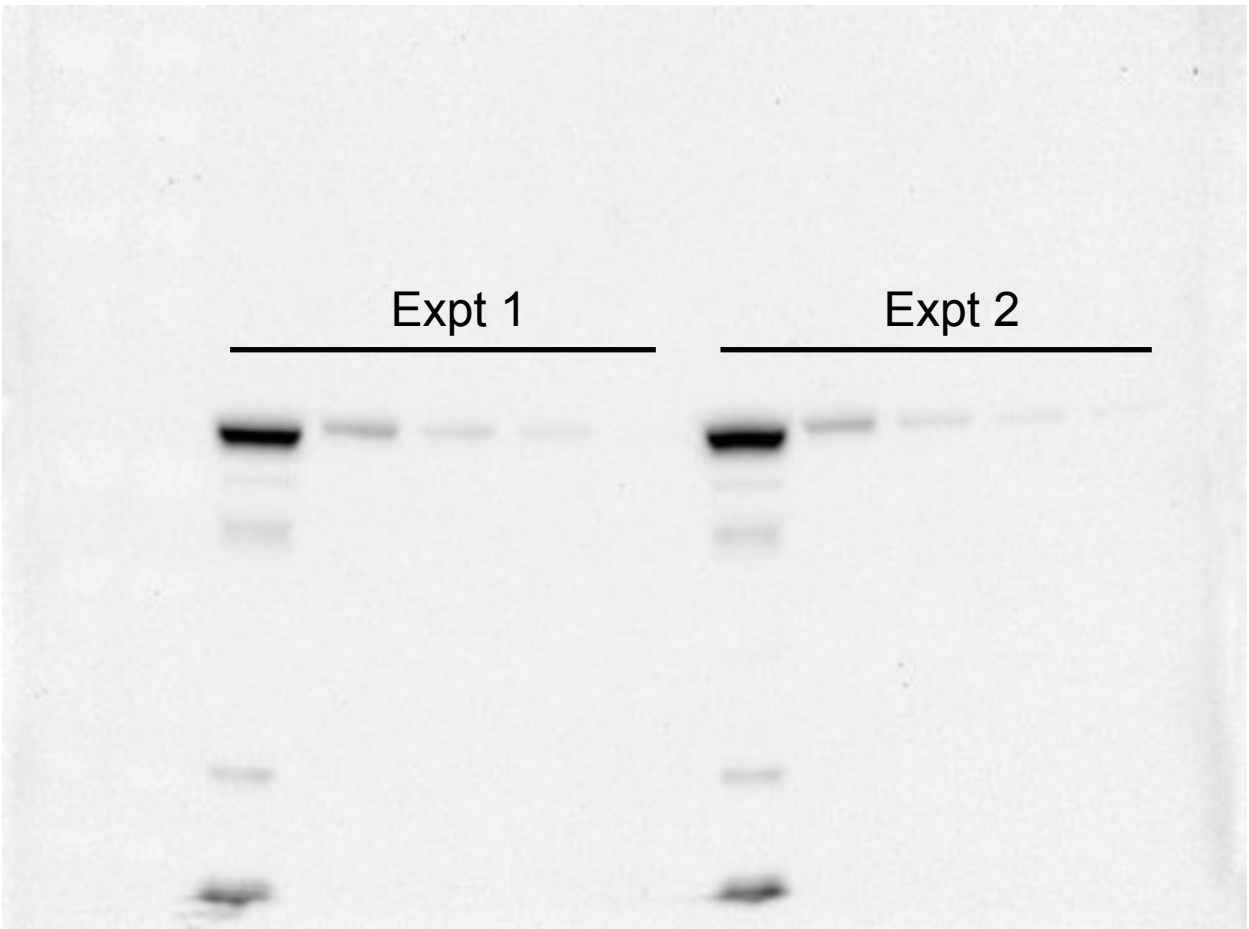

Figure 3A – beta actin

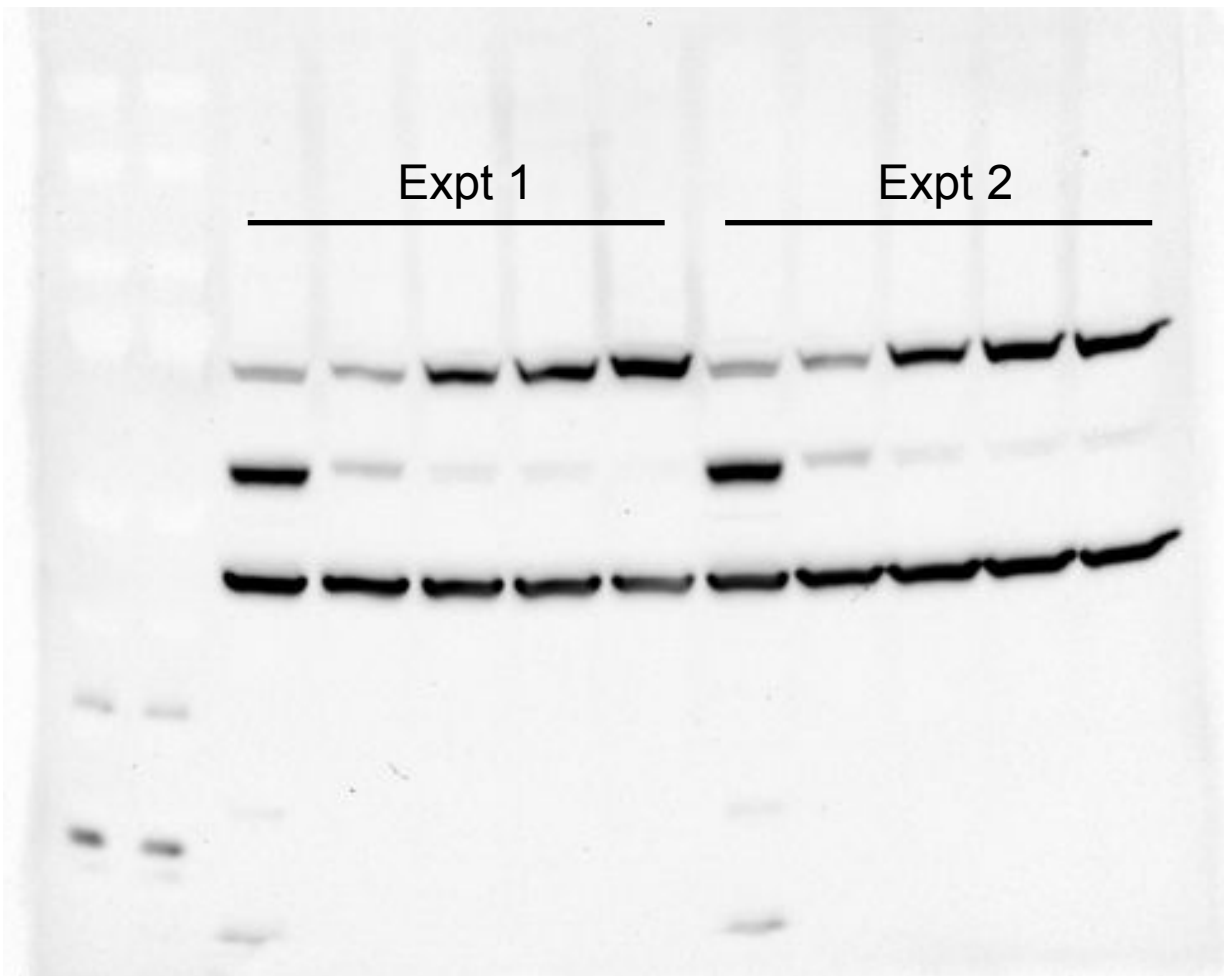

Figure 3E - GCLC

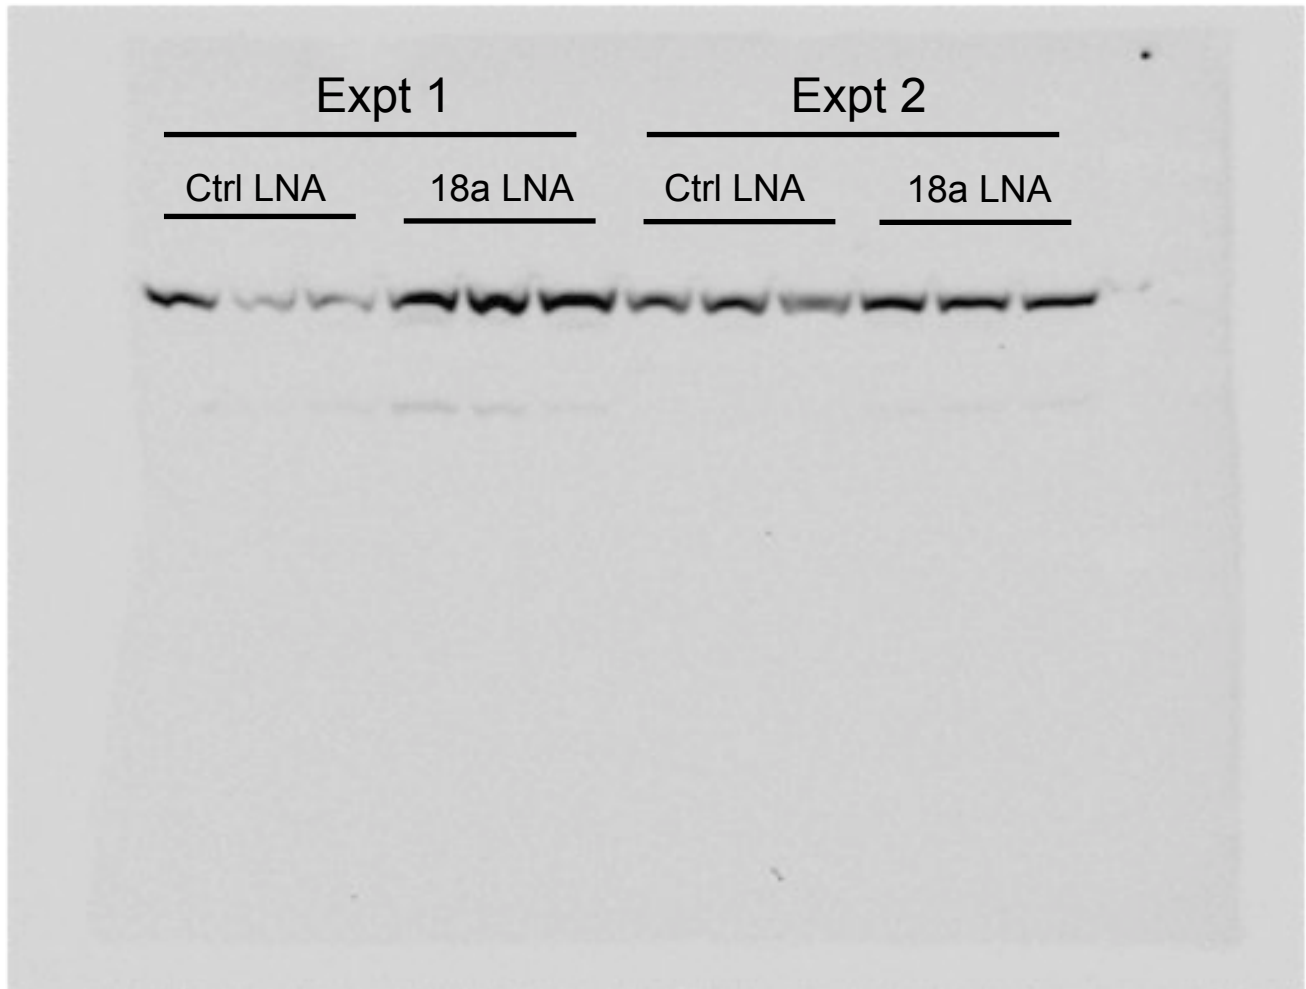

Figure 3E – beta actin

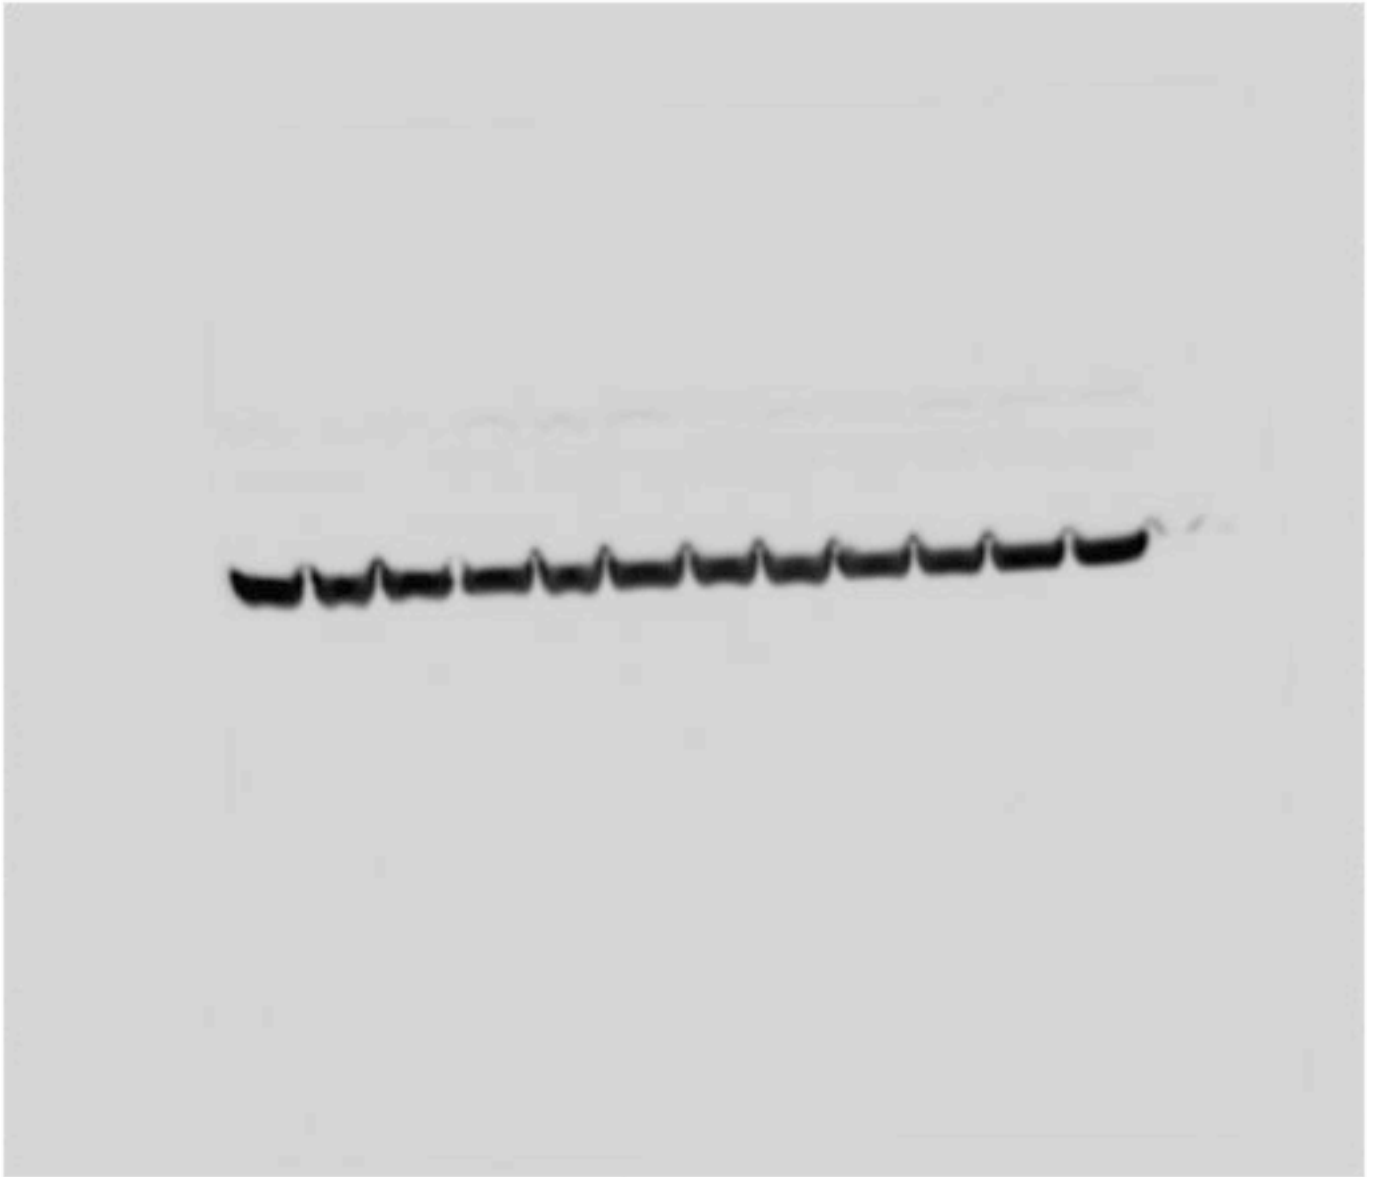

Figure 3F - GCLC

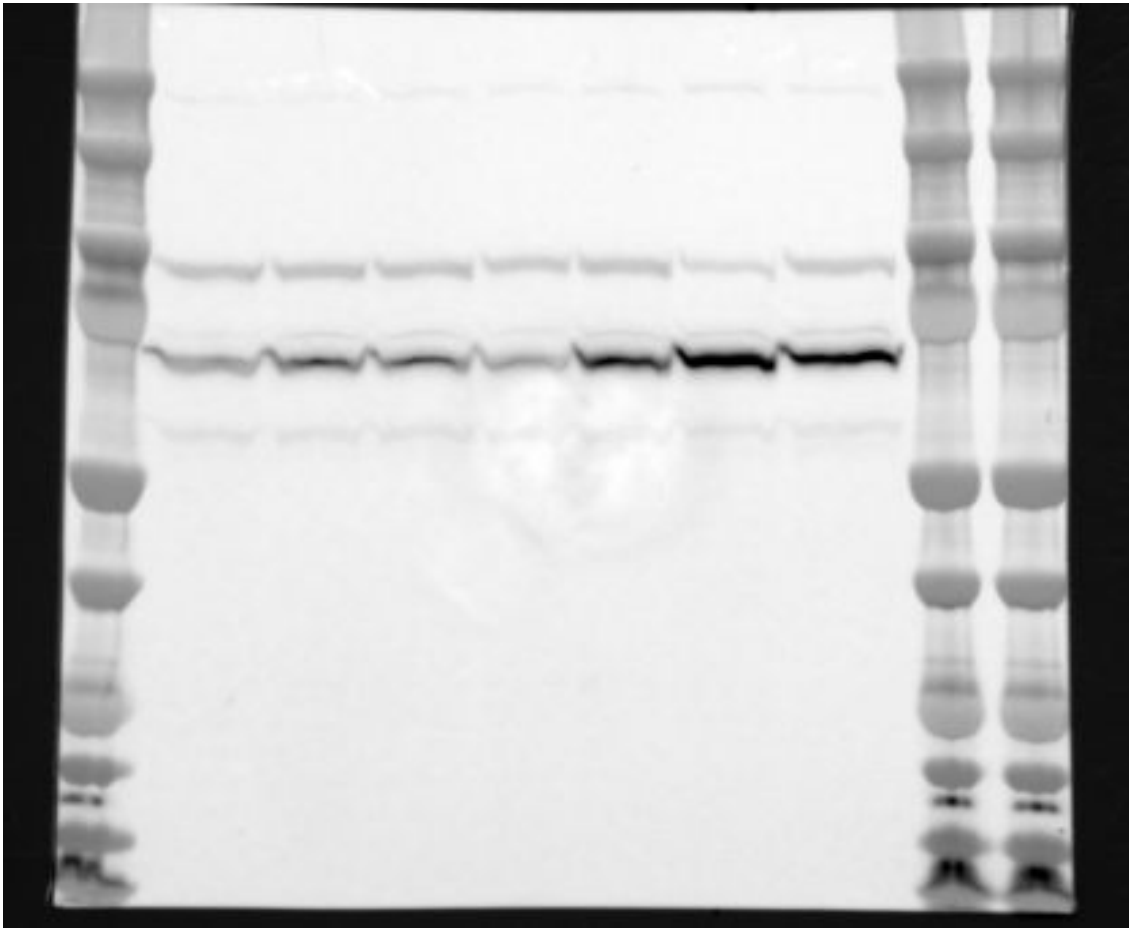

Figure 3F - Ponceau

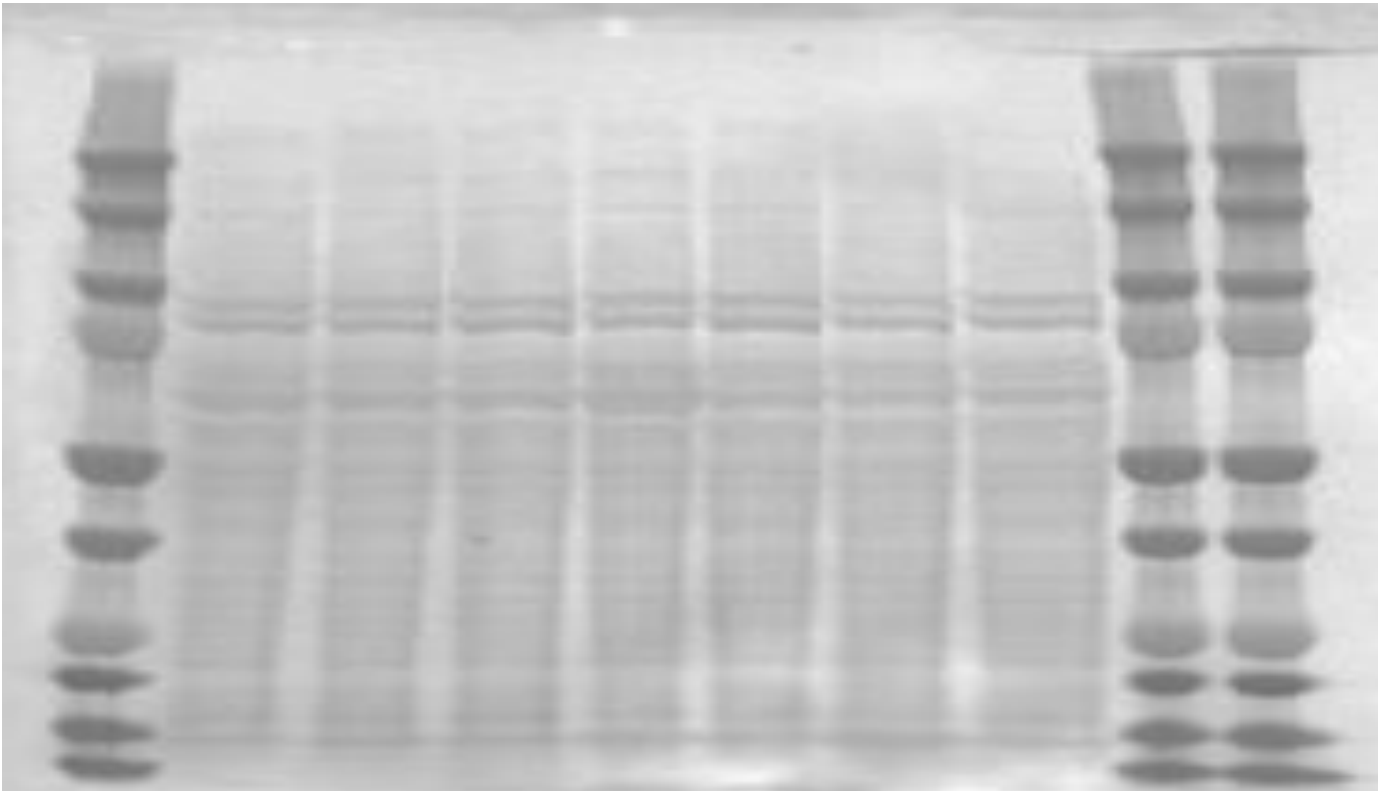

Supplement: EMBR-18-569-s006.pdf [file EMBR-18-569-s006.pdf]
