# Supplementary material
Source: PubMed Central journal article supplement (PMC5376764)

Figure 1A - AFP

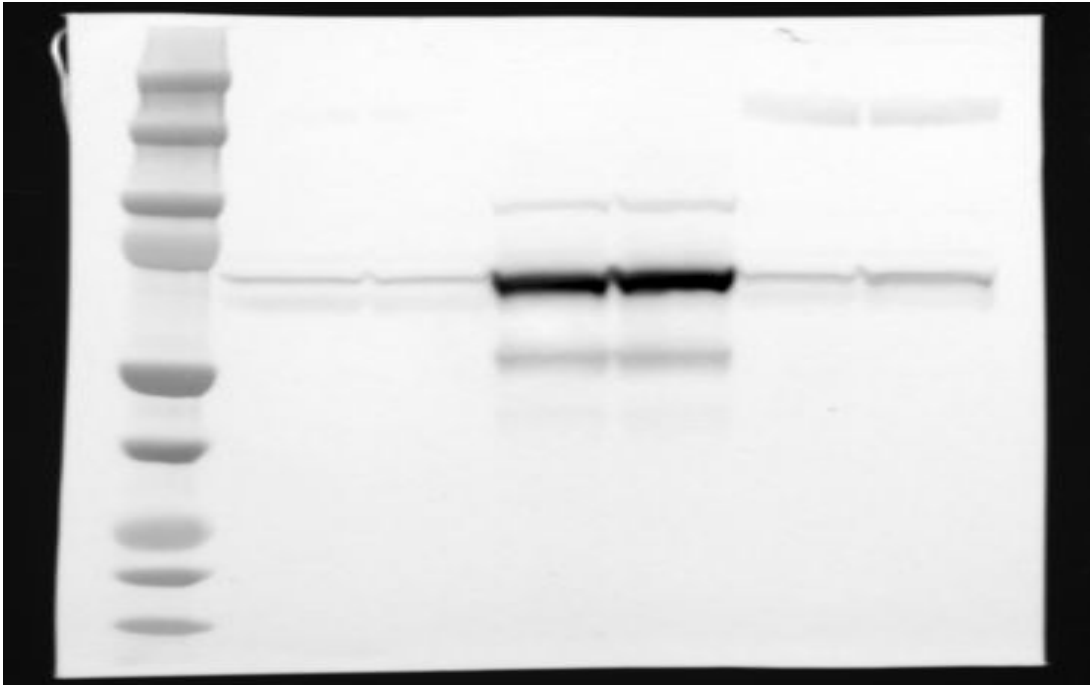

Figure 1A - MYC

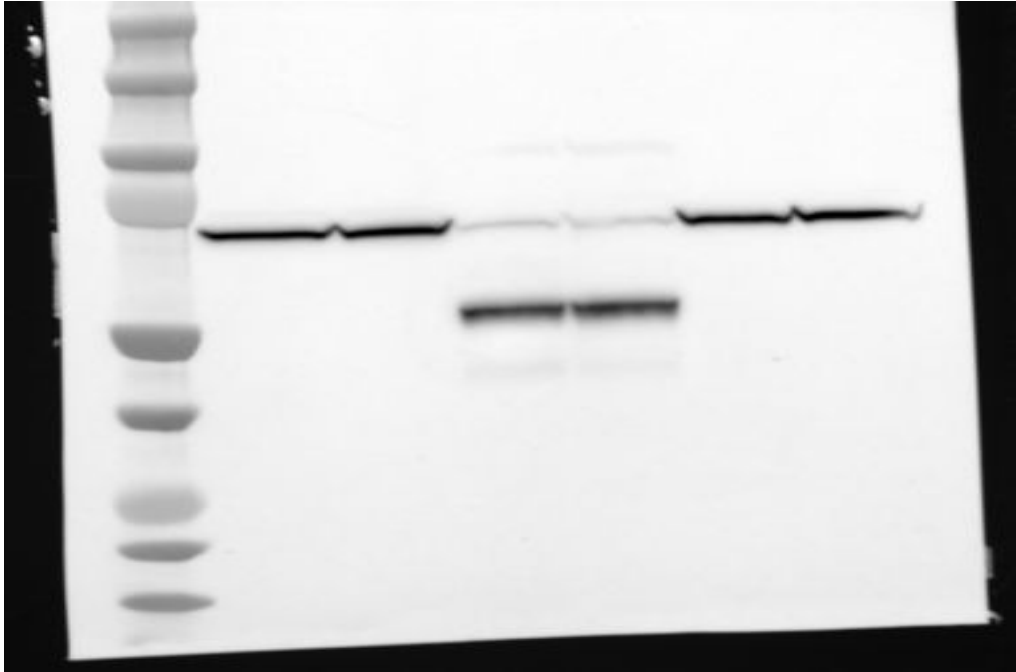

Figure 1A - Ponceau

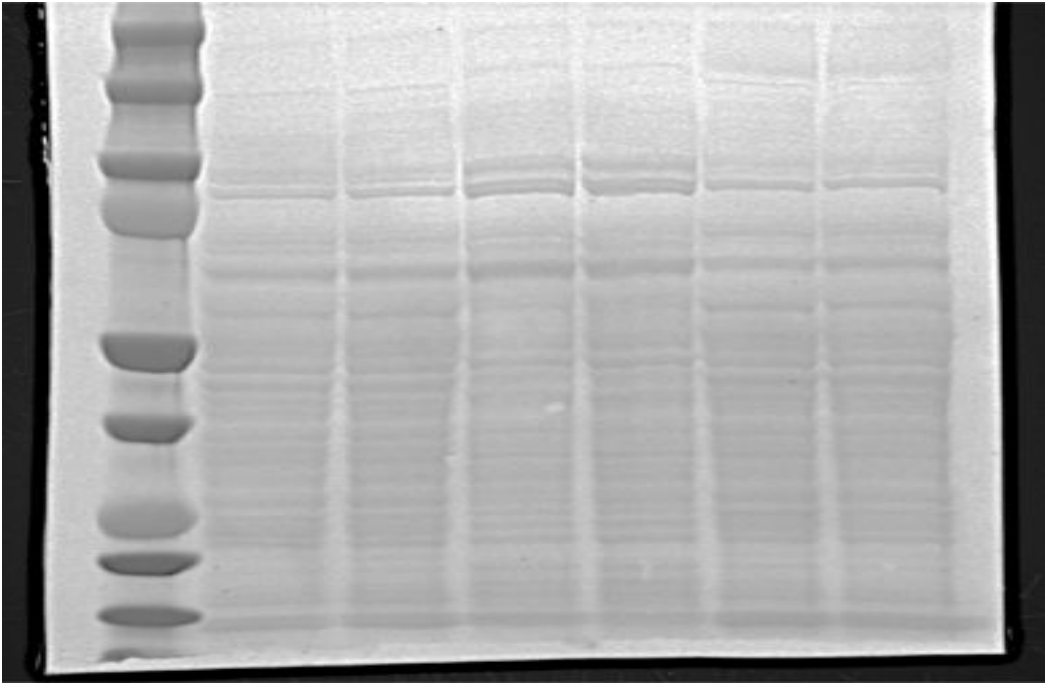

Supplement: EMBR-18-569-s004.pdf [file EMBR-18-569-s004.pdf]

Figure 5B - MYC

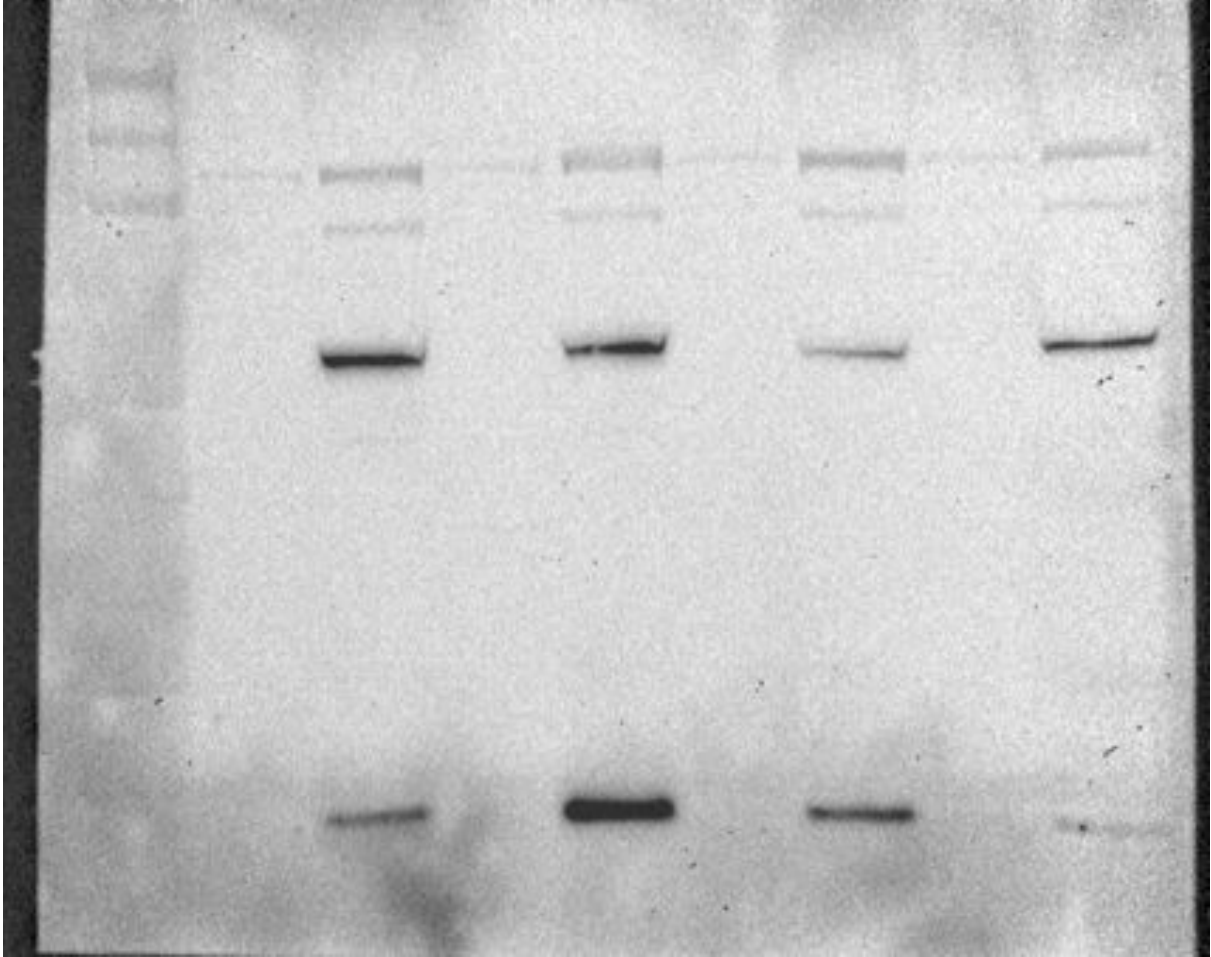

Figure 5B - Ponceau

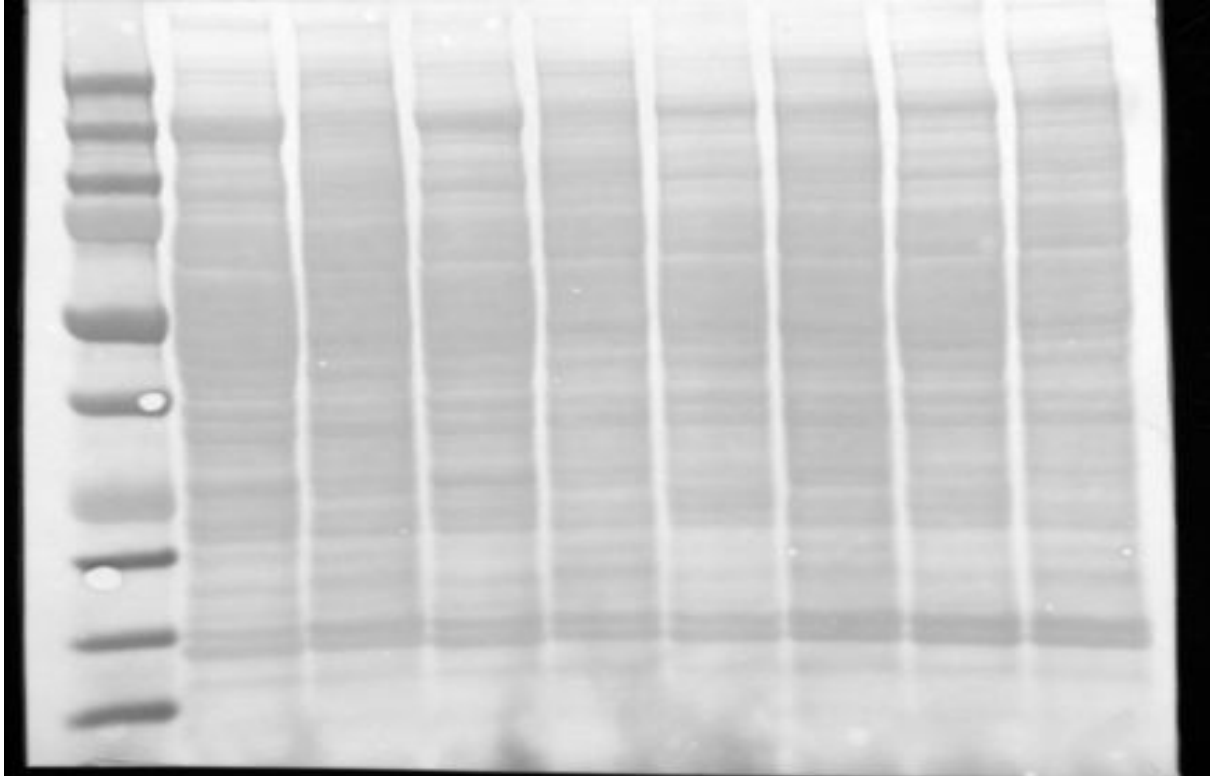

Figure 5C - MYC

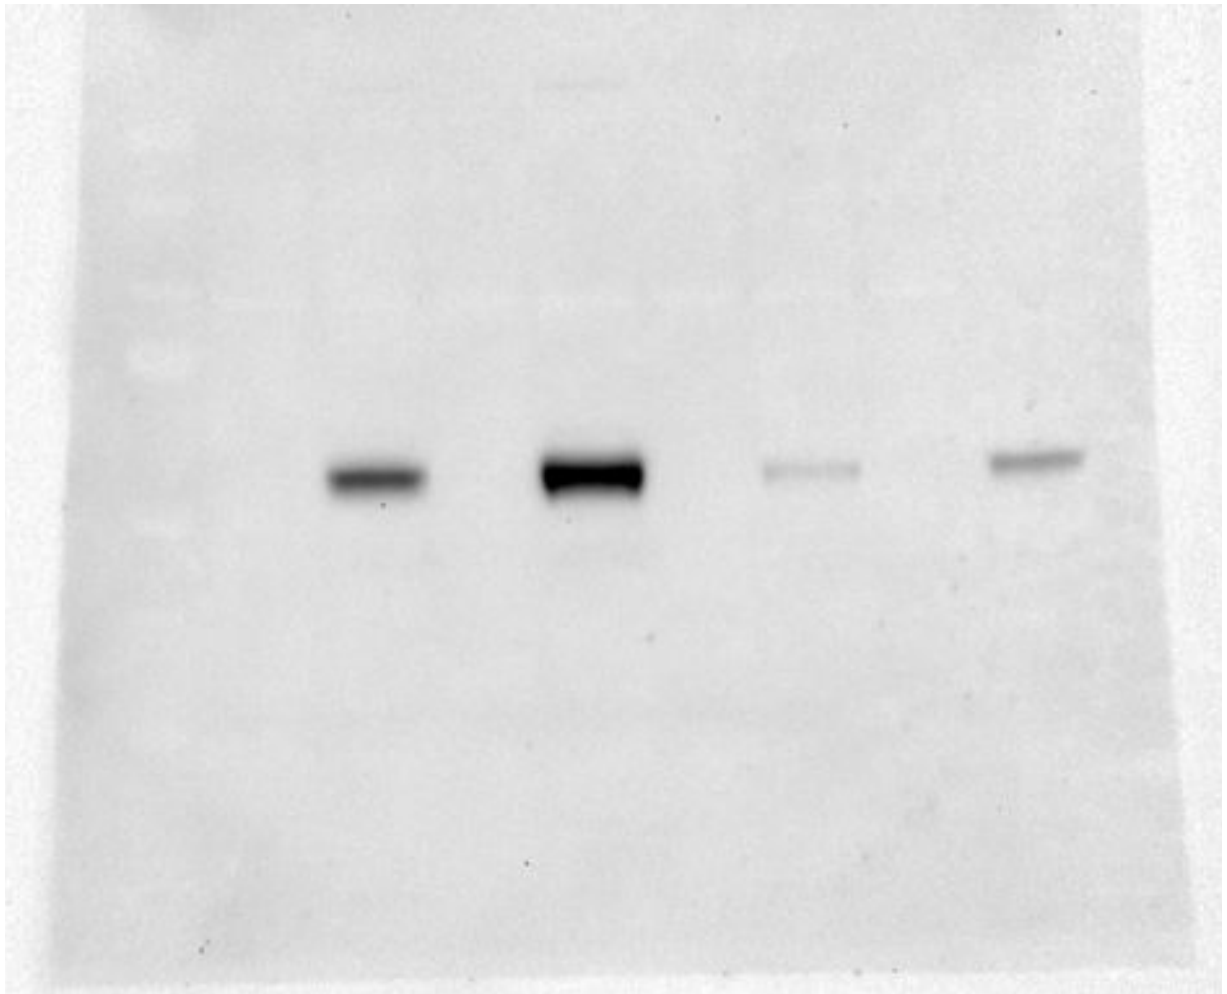

Figure 5B - Ponceau

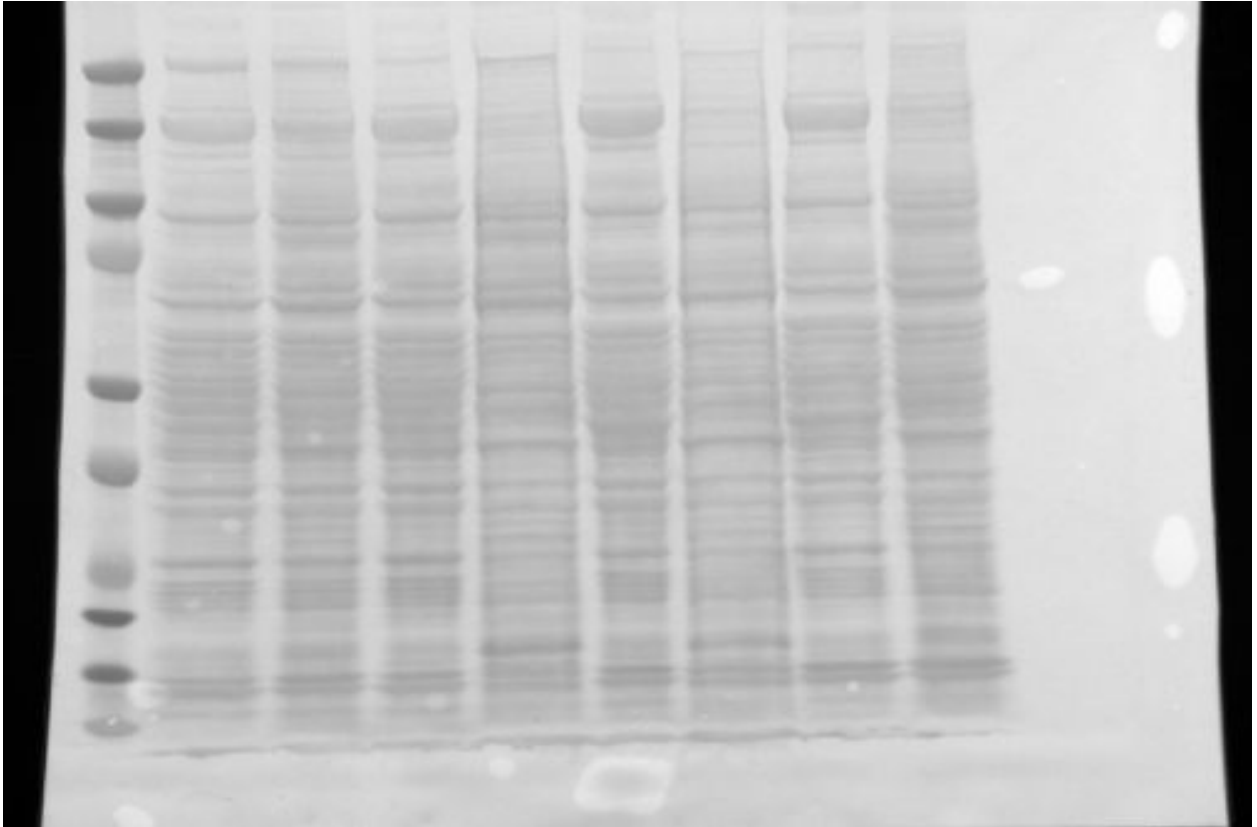

Supplement: EMBR-18-569-s007.pdf [file EMBR-18-569-s007.pdf]
